# Supplementary material
Source: PubMed Central journal article supplement (PMC10504874)

## Supporting Information

### **Self-Masked Aldehyde Inhibitors: A Novel Strategy for Inhibiting Cysteine Proteases**

Linfeng Li,<sup>†</sup> Bala C. Chenna,<sup>†</sup> Kai S. Yang,<sup>‡</sup> Taylor R. Cole,<sup>†</sup> Zachary T. Goodall,<sup>†</sup> Miriam Giardini,<sup>§</sup> Zahra Moghadamchargari,<sup>‡</sup> Elizabeth A. Hernandez,<sup>†</sup> Jana Gomez,<sup>†</sup> Claudia M. Calvet,<sup>§</sup> Jean A. Bernatchez,<sup>§</sup> Drake M. Mellott,<sup>†</sup> Jiyun Zhu,<sup>†</sup> Andrew Rademacher,<sup>†</sup> Diane Thomas,<sup>§</sup> Lauren R. Blankenship,<sup>‡</sup> Aleksandra Drelich,<sup>||</sup> Arthur Laganowsky,<sup>‡</sup> Chien-Te K. Tseng,<sup>||</sup> Wenshe R. Liu,<sup>†,‡</sup> A. Joshua Wand,<sup>†</sup> Jorge Cruz-Reyes,<sup>†</sup> Jair L. Siqueira-Neto,<sup>§</sup> and Thomas D. Meek<sup>\*,†</sup>

<sup>†</sup>Department of Biochemistry and Biophysics, Texas A&M University, 300 Olsen Blvd, College Station, TX 77843, USA

<sup>‡</sup>Department of Chemistry, Texas A&M University, 580 Ross St, College Station, TX 77843, USA

<sup>§</sup>Skaggs School of Pharmacy and Pharmaceutical Sciences, University of California San Diego, 9500 Gilman Dr, La Jolla, CA 92093, USA

<sup>||</sup>Department of Microbiology and Immunology, University of Texas Medical Branch, 301 University Blvd, Galveston, TX 77555, USA

#### Table of Contents

|                              |     |
|------------------------------|-----|
| Supplementary Tables.....    | S2  |
| Supplementary Figures.....   | S4  |
| NMR Spectra.....             | S9  |
| HPLC traces and MS data..... | S28 |

**Table S1.** Kinetic parameters obtained from rapid dilution assays

| Compound  | $k_{obs}$ ( $\times 10^{-4} \text{ s}^{-1}$ ) | Residence time          | Estimated $k_d$                                  |
|-----------|-----------------------------------------------|-------------------------|--------------------------------------------------|
|           |                                               | $\tau$ (s) <sup>a</sup> | ( $\times 10^{-4} \text{ s}^{-1}$ ) <sup>b</sup> |
| <b>1</b>  | 3.18 $\pm$ 0.24                               | 3141                    | 2.89                                             |
| <b>2</b>  | 30.2 $\pm$ 1.9                                | 331                     | 27.5                                             |
| <b>6</b>  | 67.4 $\pm$ 4.8                                | 148                     | 61.3                                             |
| <b>7</b>  | 54.3 $\pm$ 3.5                                | 184                     | 49.4                                             |
| <b>8</b>  | 62.4 $\pm$ 2.5                                | 160                     | 56.8                                             |
| <b>9</b>  | 32.1 $\pm$ 1.3                                | 312                     | 29.2                                             |
| <b>10</b> | 53.1 $\pm$ 5.7                                | 188                     | 48.3                                             |
| <b>11</b> | 3.71 $\pm$ 0.21                               | 2695                    | 3.37                                             |
| <b>12</b> | 6.33 $\pm$ 0.42                               | 1580                    | 5.75                                             |

<sup>a</sup>Residence time  $\tau = 1/k_{obs}$ ; <sup>b</sup> $k_d$  values were estimated from  $k_{obs}$  based on eq. 3

**Table S2.** The details of peaks in <sup>1</sup>H-<sup>13</sup>C HSQC NMR

| peak                       | <sup>1</sup> H (ppm) | <sup>13</sup> C (ppm) | Width 1 | Width 2 | Volume     |
|----------------------------|----------------------|-----------------------|---------|---------|------------|
| <i><u>12</u> only</i>      |                      |                       |         |         |            |
| <b>A</b>                   | 5.34                 | 90.84                 | 192.6   | 31.4    | 40225129.1 |
| <b>B</b>                   | 5.13                 | 90.80                 | 192.59  | 26.24   | 52937692.9 |
| <i><u>12</u> + cruzain</i> |                      |                       |         |         |            |
| <b>A'</b>                  | 6.13                 | 76.25                 | 137.58  | 49.49   | 5030193.12 |
| <b>B'</b>                  | 5.91                 | 79.69                 | 165.06  | 63.22   | 6245466.52 |
| <b>A (residual)</b>        | 5.33                 | 90.81                 | 192.6   | 40.23   | 1725522.38 |

**Table S3.** Anti-CoV-2 activity of **18** on SARS-CoV-2 infected A549/ACE2 cells<sup>a</sup>

| Compound <b>18</b> ( $\mu\text{M}$ ) | A549/ACE2 cells + CoV-2 infection + inhibitor | A549/ACE2 cells + CoV-2 infection + inhibitor | A549/ACE2 cells + CoV-2 infection no inhibitor | A549/ACE2 Cells no CoV-2 infection + inhibitor |
|--------------------------------------|-----------------------------------------------|-----------------------------------------------|------------------------------------------------|------------------------------------------------|
| 20                                   | Viable                                        | Viable                                        | CPE                                            | Viable                                         |
| 10                                   | Viable                                        | Viable                                        | CPE                                            | Viable                                         |
| 5                                    | CPE                                           | Viable                                        | CPE                                            | Viable                                         |
| 2.5                                  | CPE                                           | CPE                                           | CPE                                            | Viable                                         |
| 1.25                                 | CPE                                           | CPE                                           | CPE                                            | Viable                                         |
| 0.625                                | CPE                                           | CPE                                           | CPE                                            | Viable                                         |
| 0.313                                | CPE                                           | CPE                                           | CPE                                            | Viable                                         |
| 0.156                                | CPE                                           | CPE                                           | CPE                                            | Viable                                         |

<sup>a</sup>Viable cells or CPE: microscopic examination of treated cells indicated a majority of either fully viable cells, or a majority of cells which exhibited SARS-CoV-2-induced cytopathic effect (CPE).

**Table S4.** Statistic summary of co-crystal structure of 3CL<sup>pro</sup> complexed with **18**.

| 3CL <sup>pro</sup> - <b>18</b> |                        |
|--------------------------------|------------------------|
| <b>Data collection</b>         |                        |
| Space group                    | I 1 2 1                |
| Cell dimensions                |                        |
| a, b, c (Å)                    | 54.20, 80.74, 85.76    |
| $\alpha, \beta, \gamma$ (°)    | 90.00, 97.12, 90.00    |
| Resolution (Å)                 | 48.25-1.70 (1.76-1.70) |
| $R_{merge}$                    | 0.084 (1.632)          |
| $\langle I/\sigma I \rangle$   | 1.18 (at 1.70Å)        |
| CC <sub>1/2</sub>              | 0.996 (0.475)          |
| Completeness (%)               | 99.8 (99.3)            |
| Redundancy                     | 6.4 (5.6)              |
| <b>Refinement</b>              |                        |
| Resolution (Å)                 | 48.25-1.70             |
| No. Reflections                | 40267 (4001)           |
| $R_{work}/R_{free}$            | 0.186/0.206            |
| RMSD in bond lengths (Å)       | 0.008                  |
| RMSD in bond angles (°)        | 1.17                   |
| No. atoms                      |                        |
| Protein                        | 2395                   |
| Ligand                         | 40                     |
| Water                          | 173                    |
| <b>B factors</b>               |                        |
| Protein                        | 41.6                   |
| Ligand                         | 43.4                   |
| Water                          | 44.9                   |

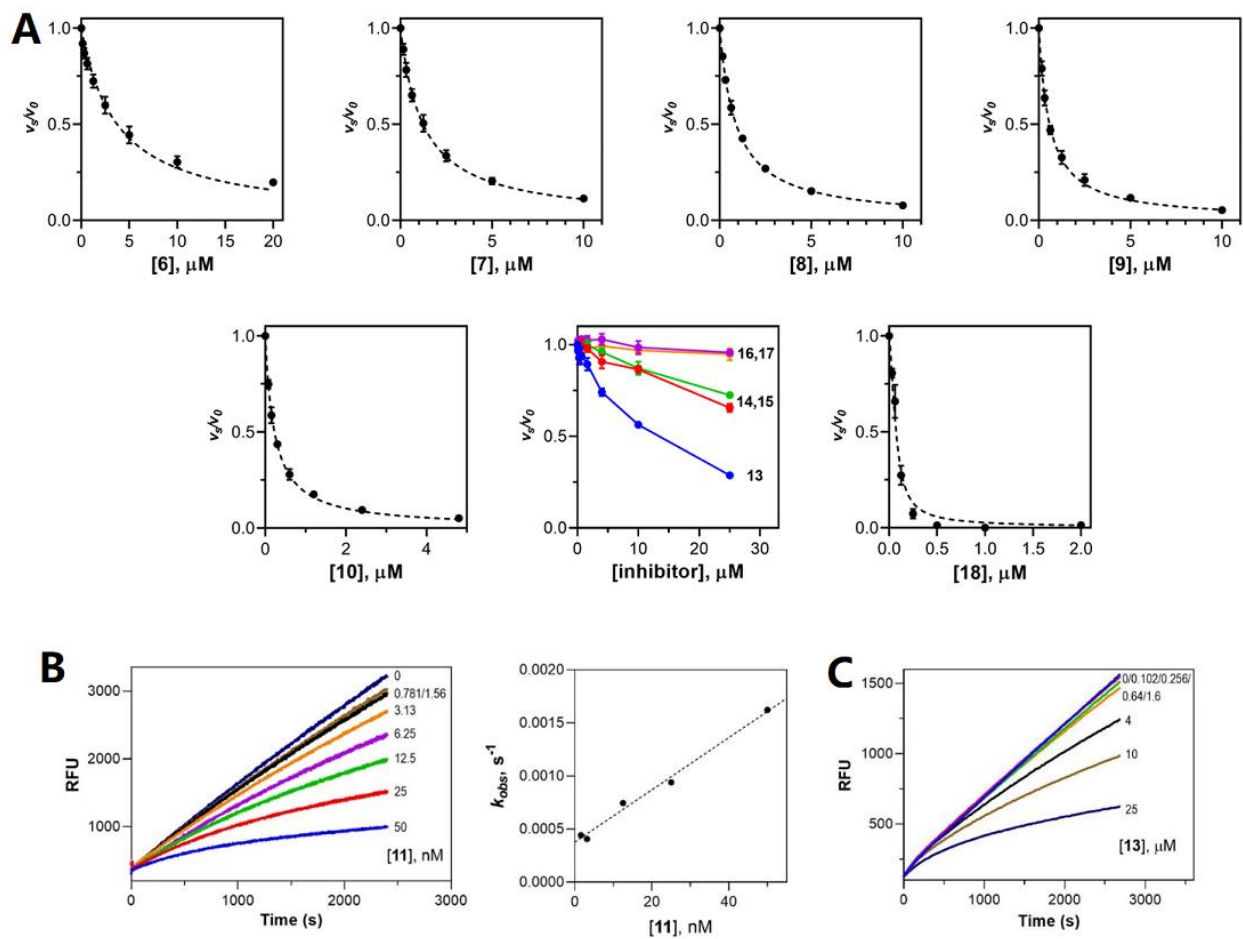

**Figure S1.** Kinetic data of cruzain inhibition by **6** – **11** and **13** – **17**, and 3CL<sup>PRO</sup> inhibition by **18**. (A) Concentration-inhibition curves for SMAs and their prodrugs. (B) Time-courses of cruzain inhibition by free aldehyde **11**. The  $k_{obs}$  values were obtained by fitting progress curves to eq. 1. Replot of  $k_{obs}$  vs. [11] with the line drawn through data points from fitting to eq. 3 which afforded  $k_A = (3.8 \pm 0.4) \times 10^{-4} \text{ s}^{-1}$ . (C) Time-courses of cruzain inhibition by **13**.

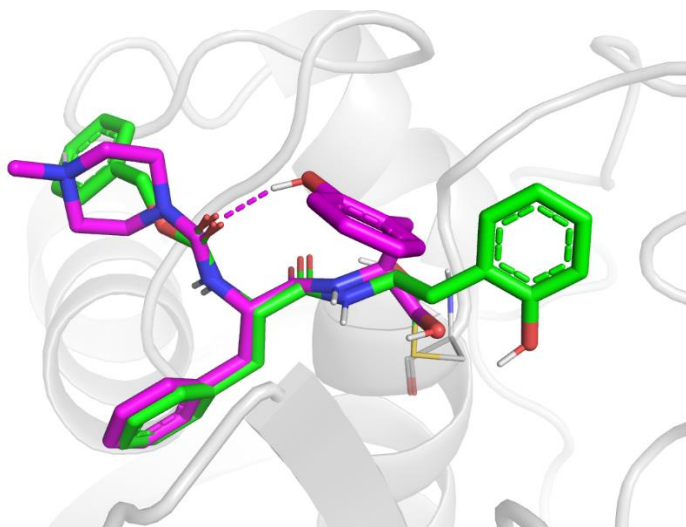

**Figure S2.** Compound **12** (magenta) was covalently docked to cruzain, and was superimposed with compound **2** (green). The intramolecular hydrogen bond between P<sub>1</sub> phenol and P<sub>3</sub> carbonyl group was drawn as magenta dashed lines.

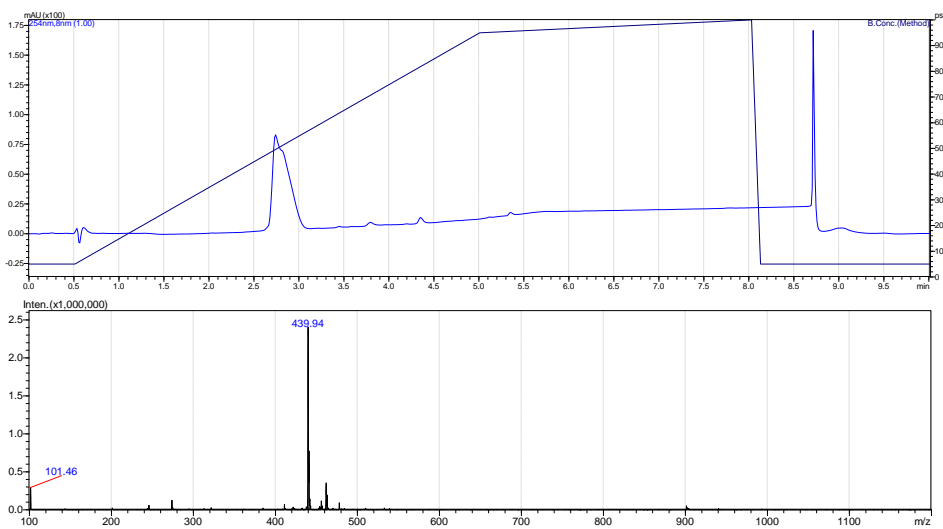

**Figure S3.** LC-MS of <sup>13</sup>C-labeled **12**. Calculated m/z for molecular ion is 440.24 for hemiacetal and 458.25 for hydrate.

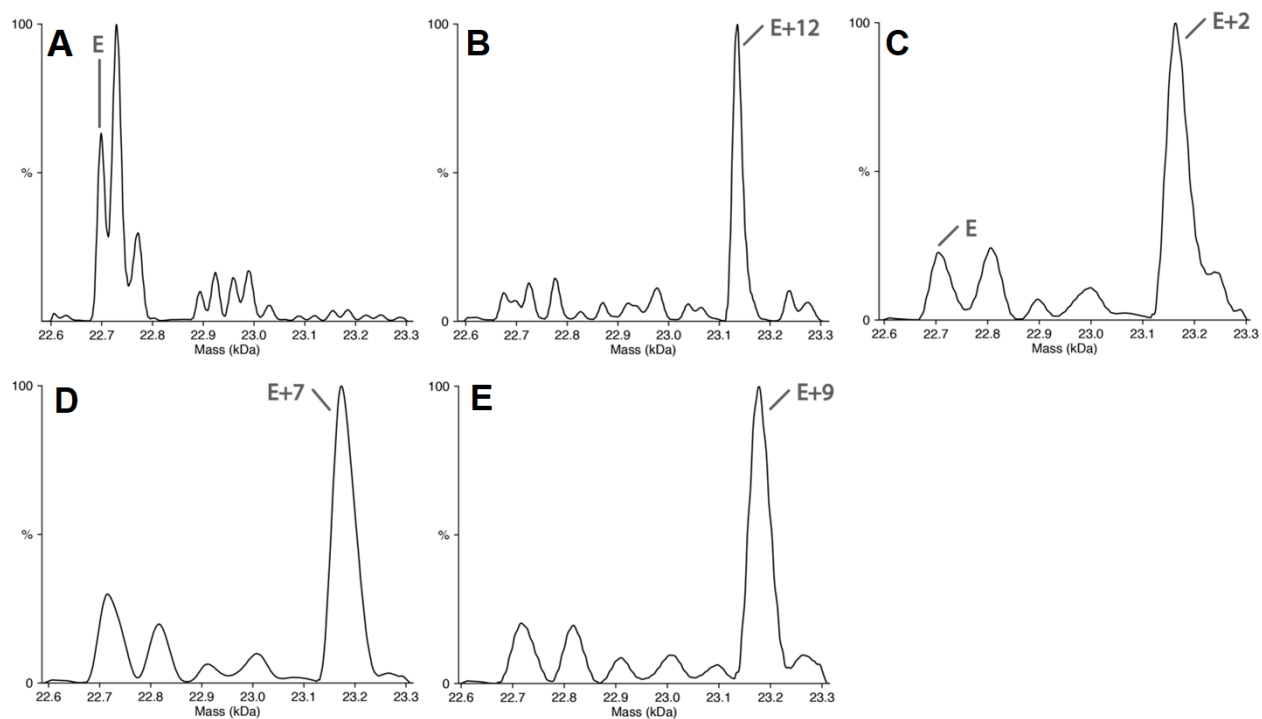

**Figure S4.** Native mass spectra of cruzain pre-incubated with selected SMAIs. The deconvoluted mass spectra are shown for 25  $\mu\text{M}$  cruzain (A) alone or treated with 50  $\mu\text{M}$  compounds (B) **12**, (C) **2**, (D) **7** and (E) **9**. The addition of compound **12** shows that compound is bound to apo-enzyme with a measured mass of 438.8 Da, consistent with the theoretical mass of **12** (438 Da).

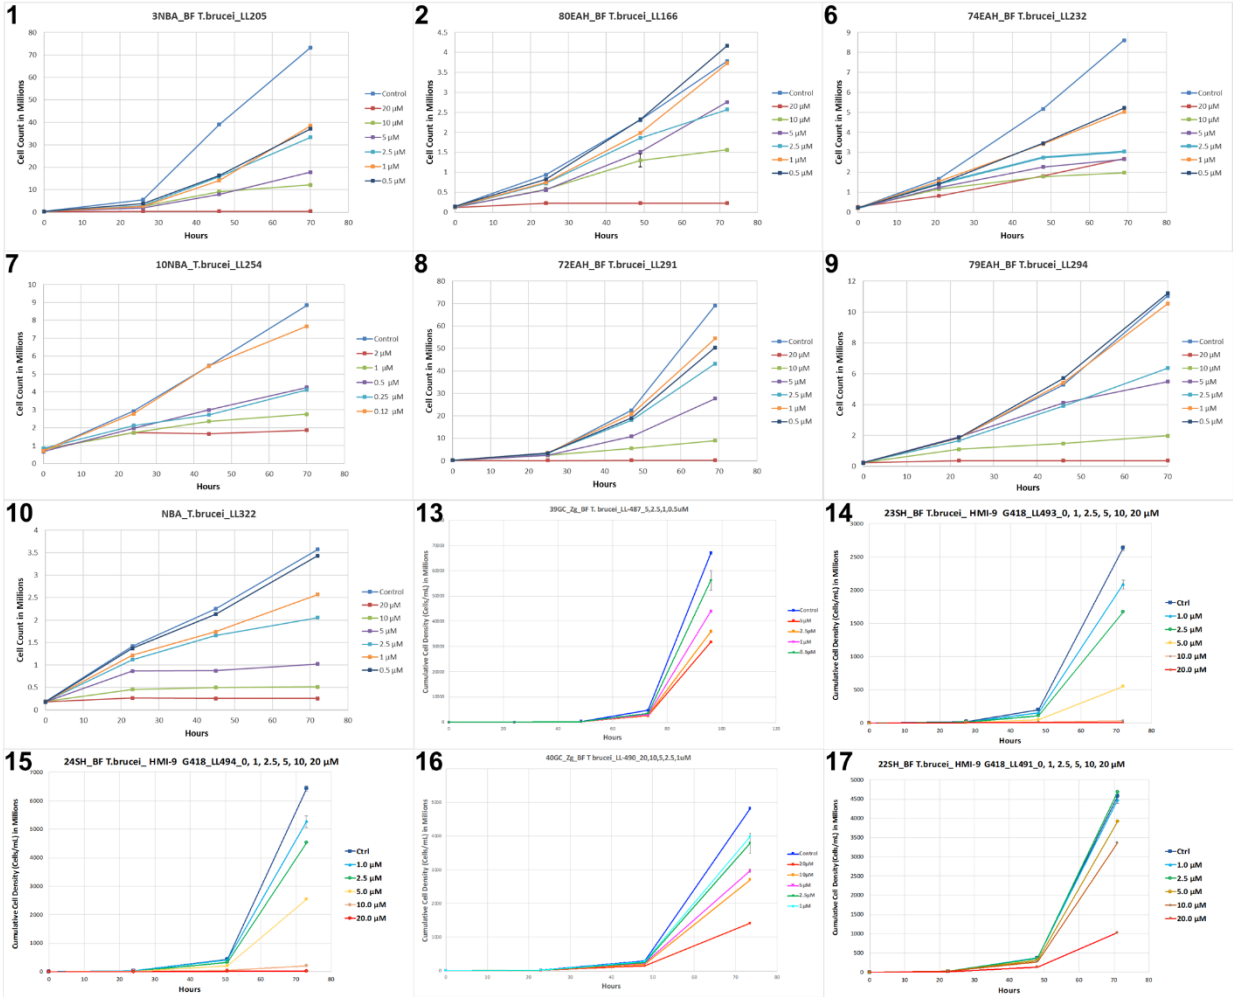

**Figure S5.** Growth curves for *T. brucei* BSFs treated with SMAIs and their prodrugs. Each diagram only represents one of the duplicate experiments.

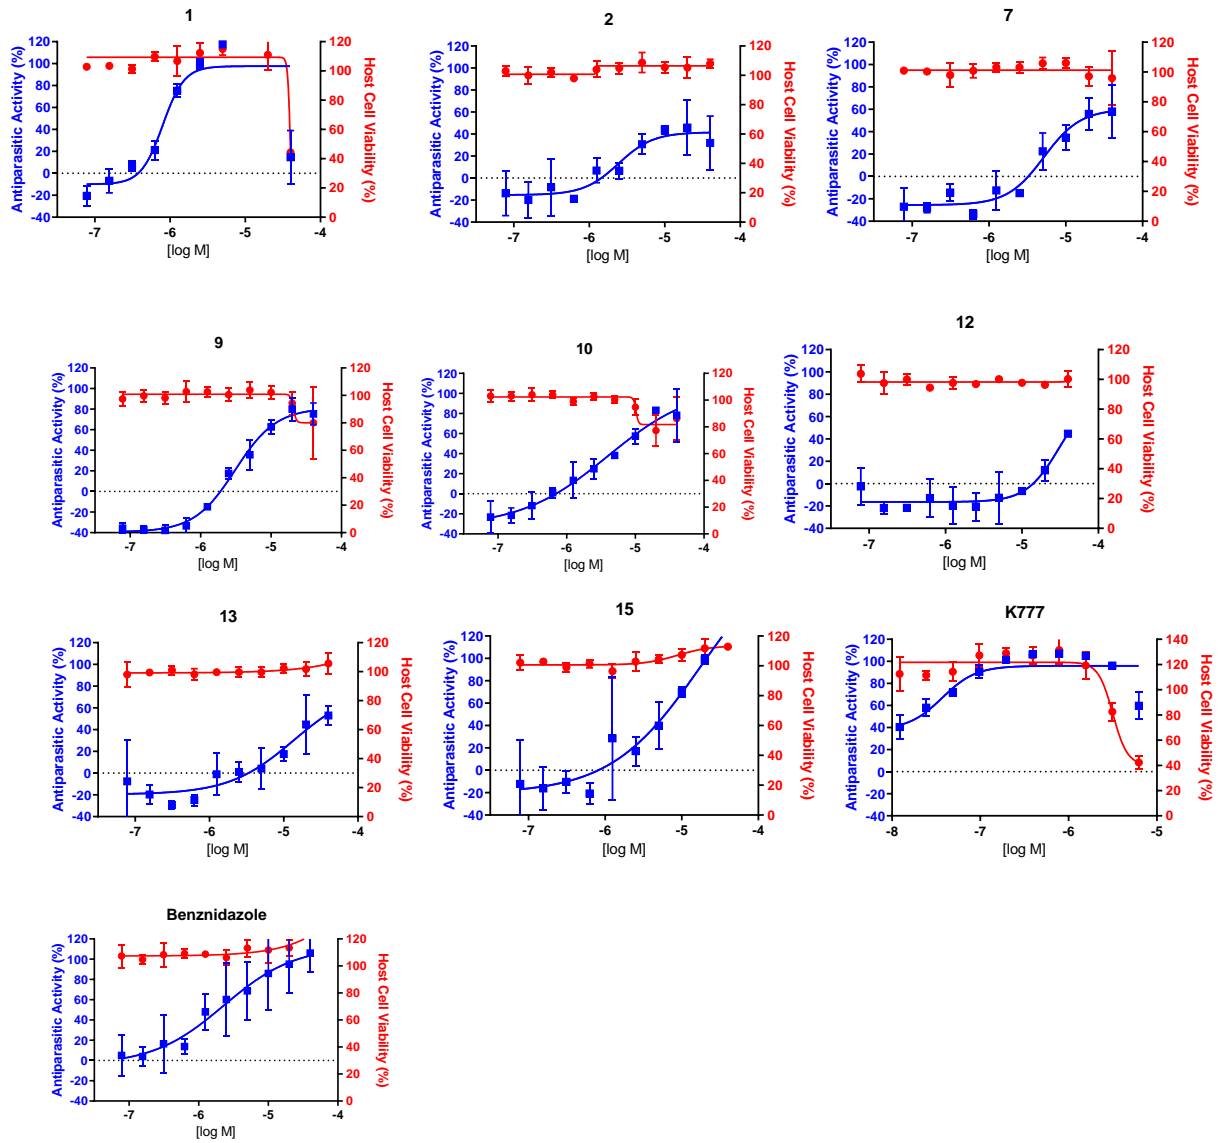

**Figure S6.** Cell viability of *T. cruzi*-infected murine cardiomyoblasts in presence of 1, 2, 7, 9, 10, 12, 13, 15, K777, and benznidazole.



## NMR spectra

(Note: The presence of lactol anomers in many SMAIs led to complicated splitting/overlapping and low-quality NMR spectra; therefore, the NMR spectra of corresponding precursors (the second last products) were provided.)

1:

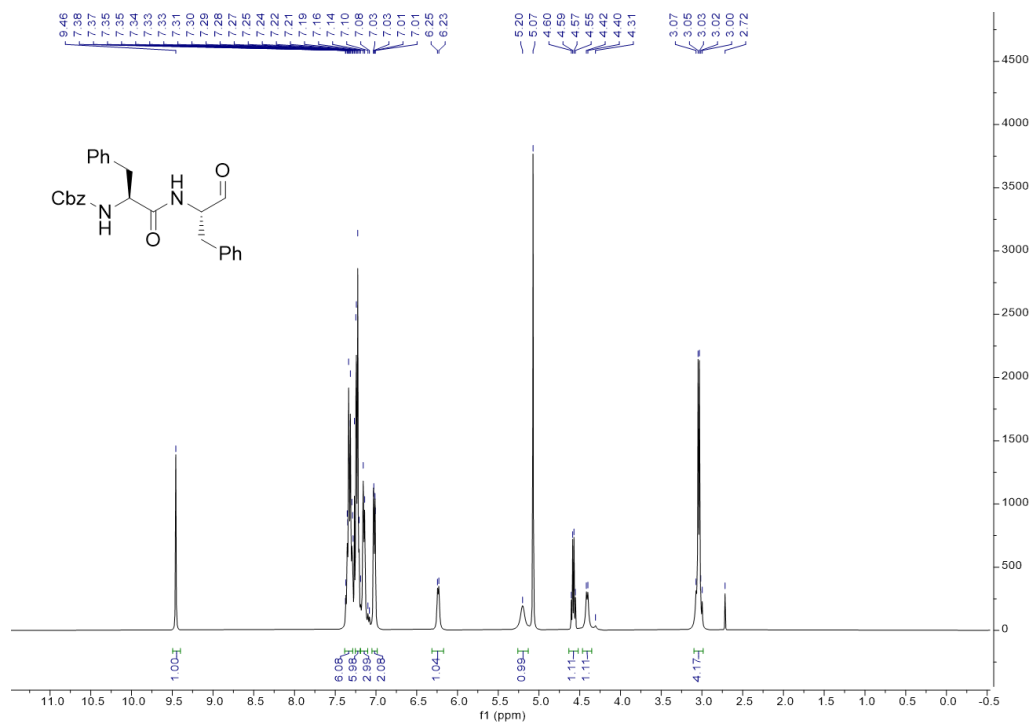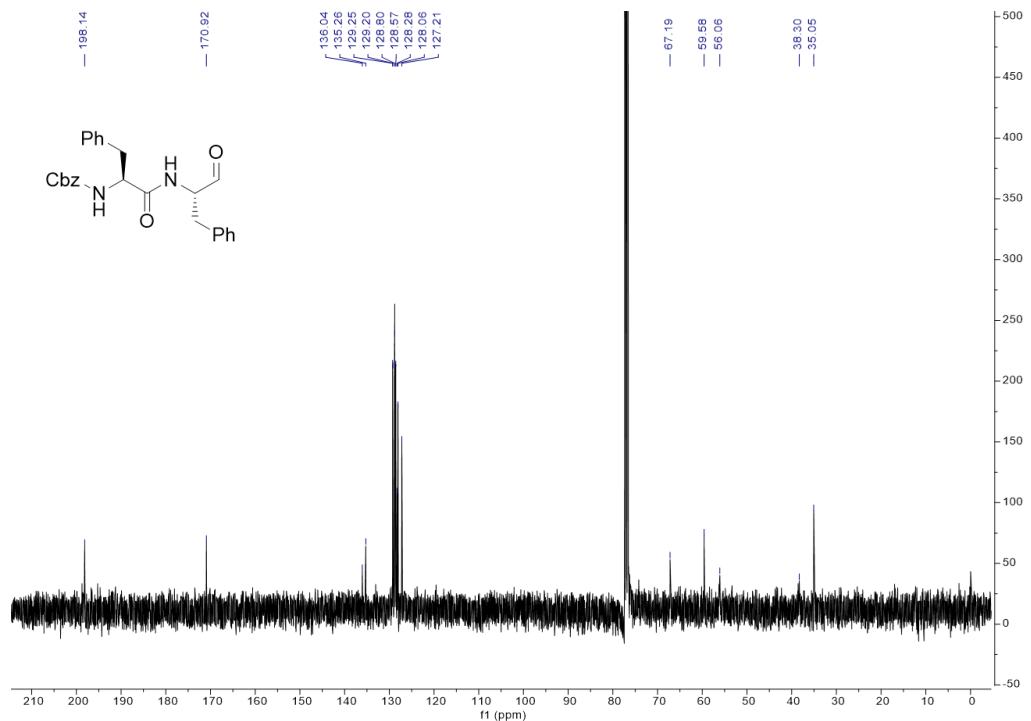

2:

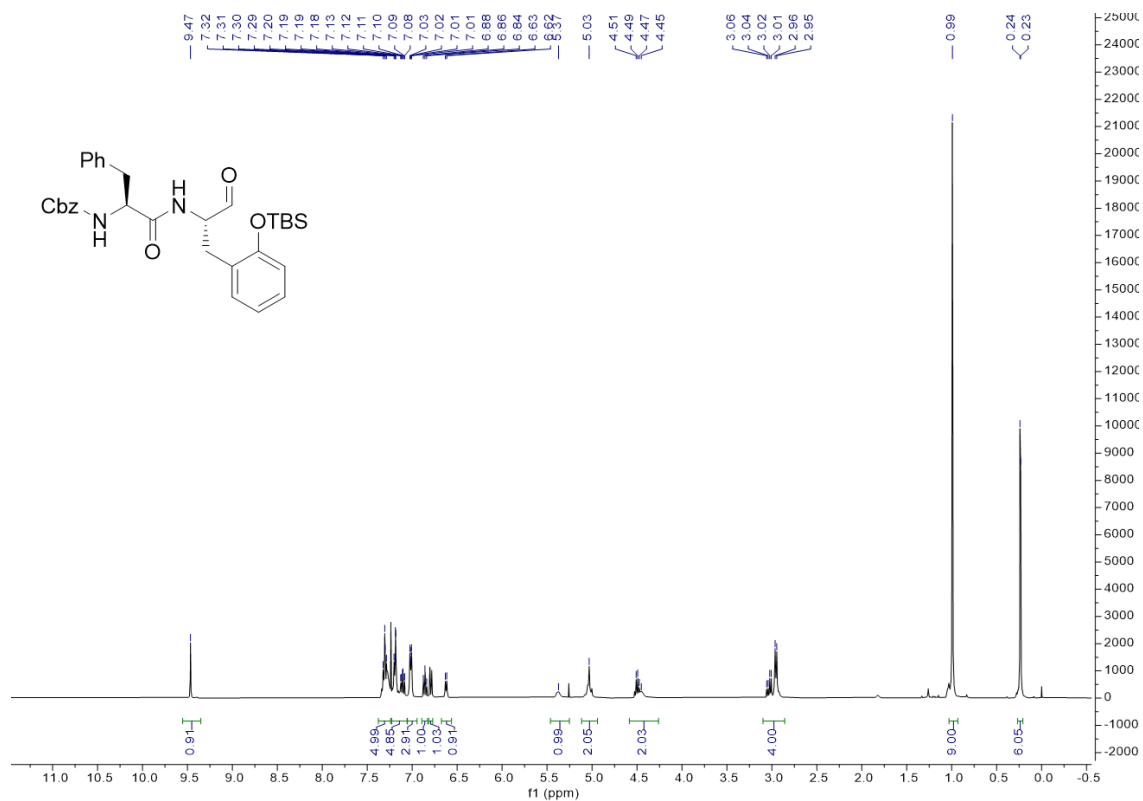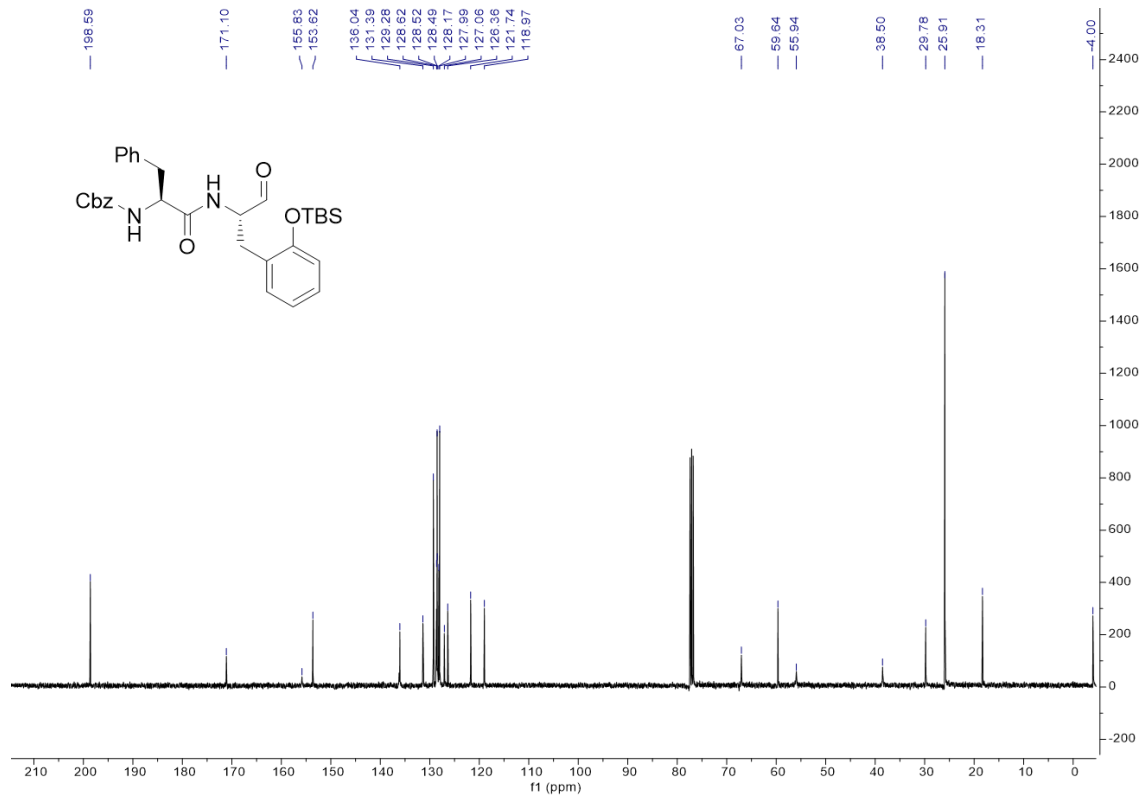

3:

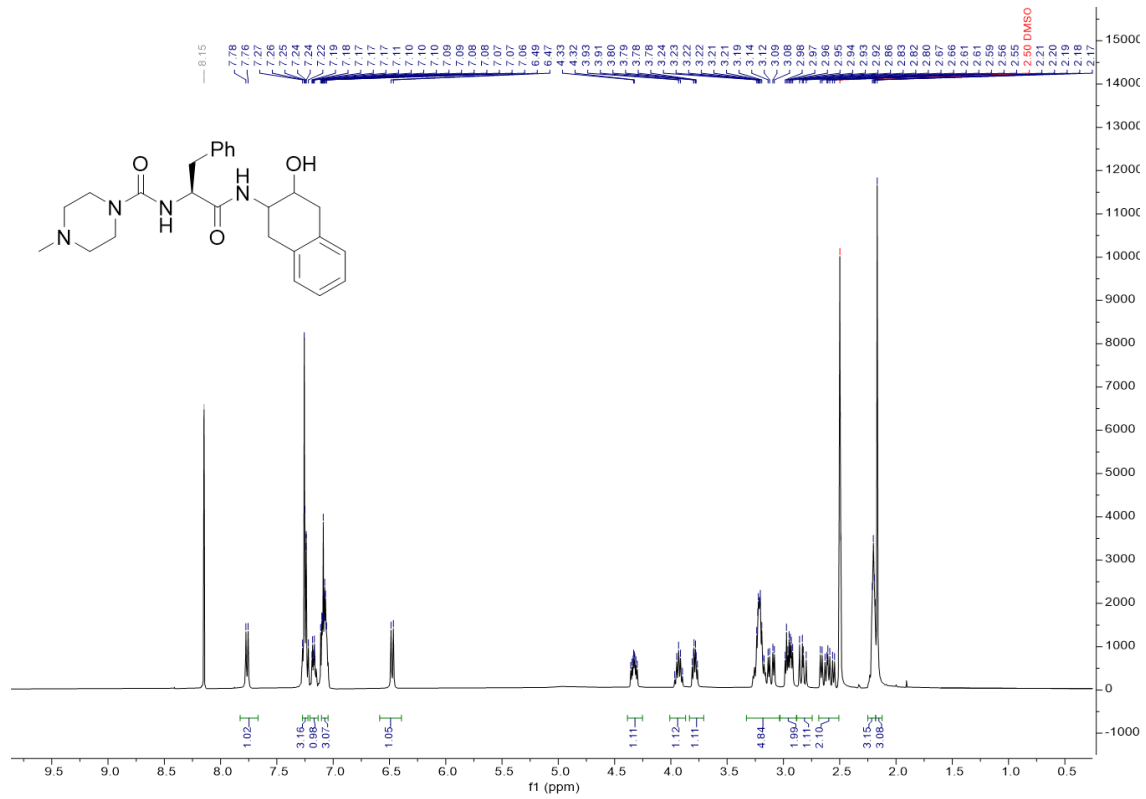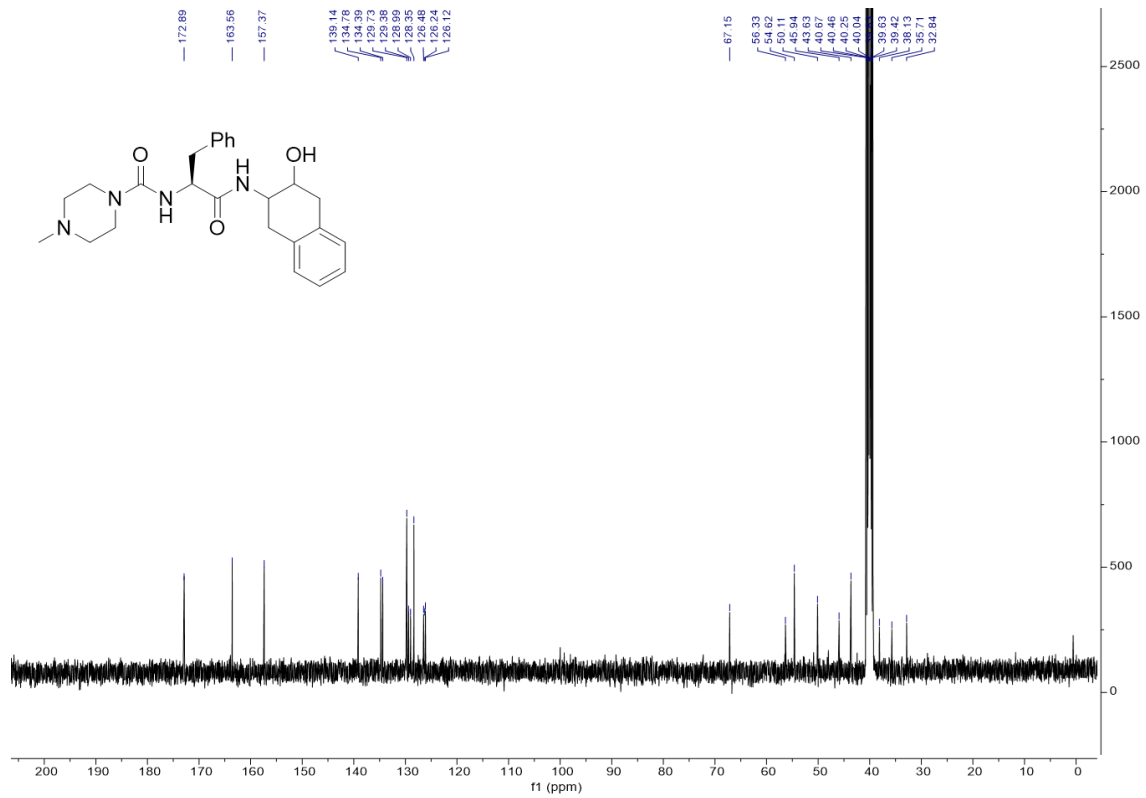

4:

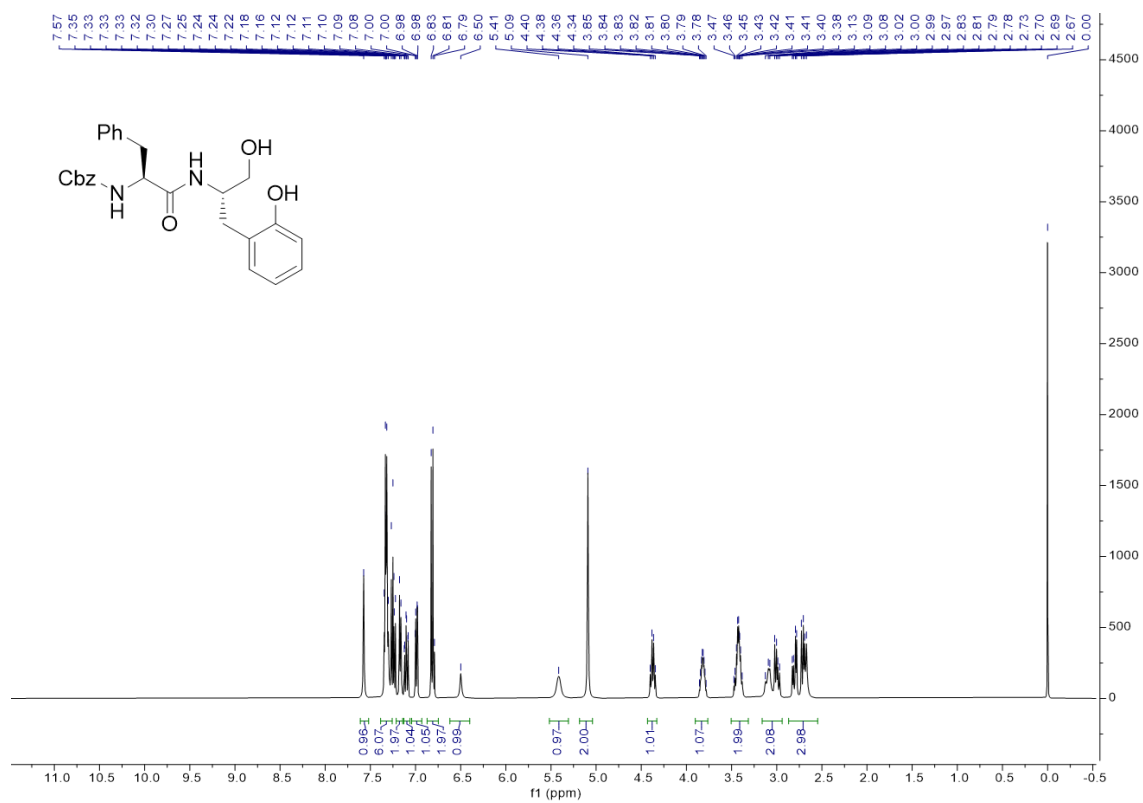



7:

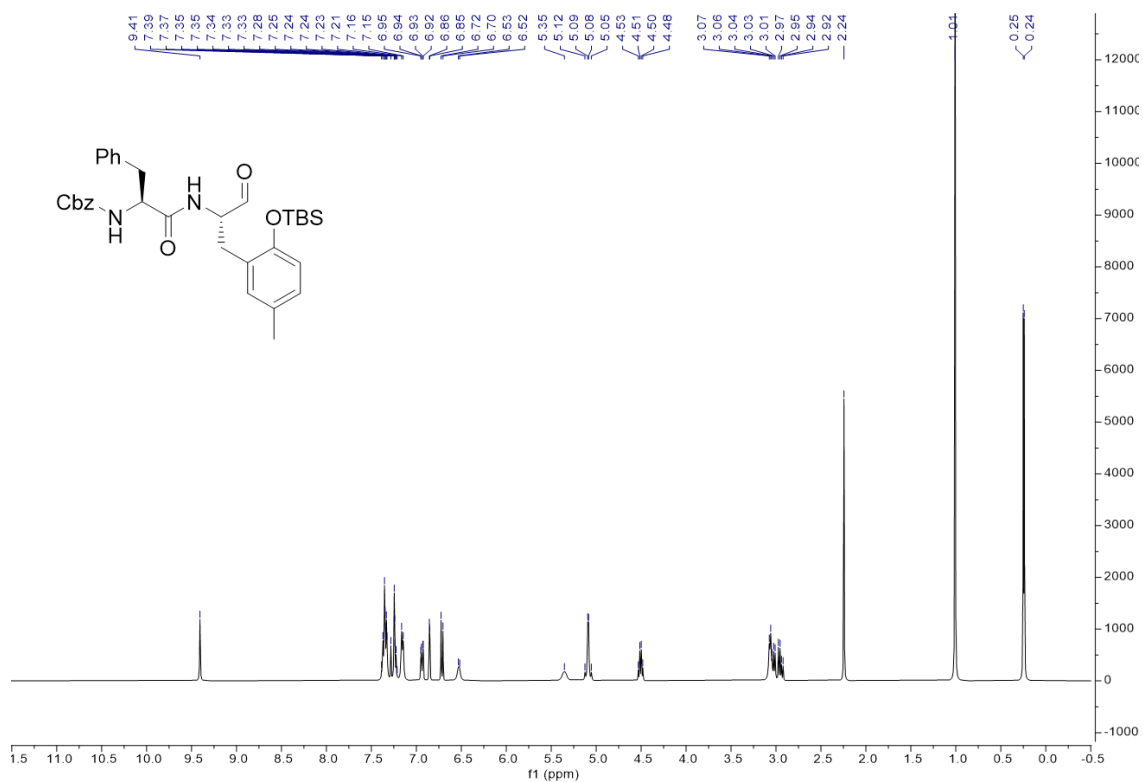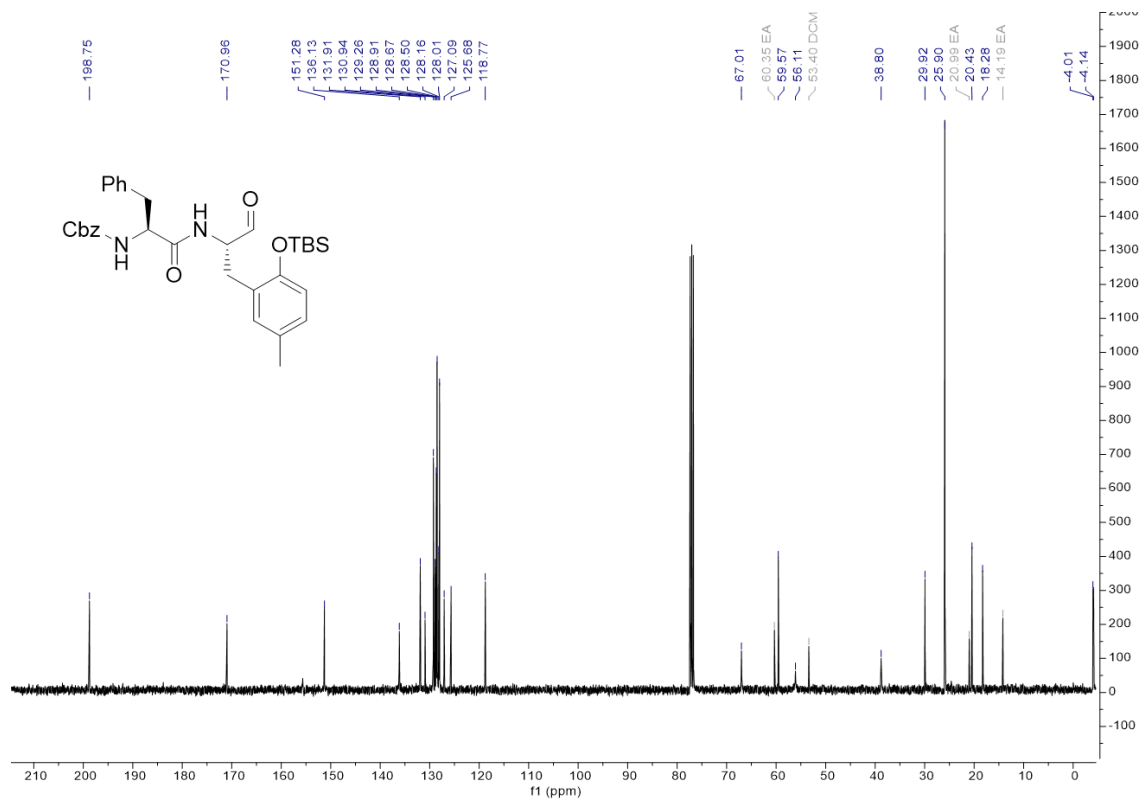

8:

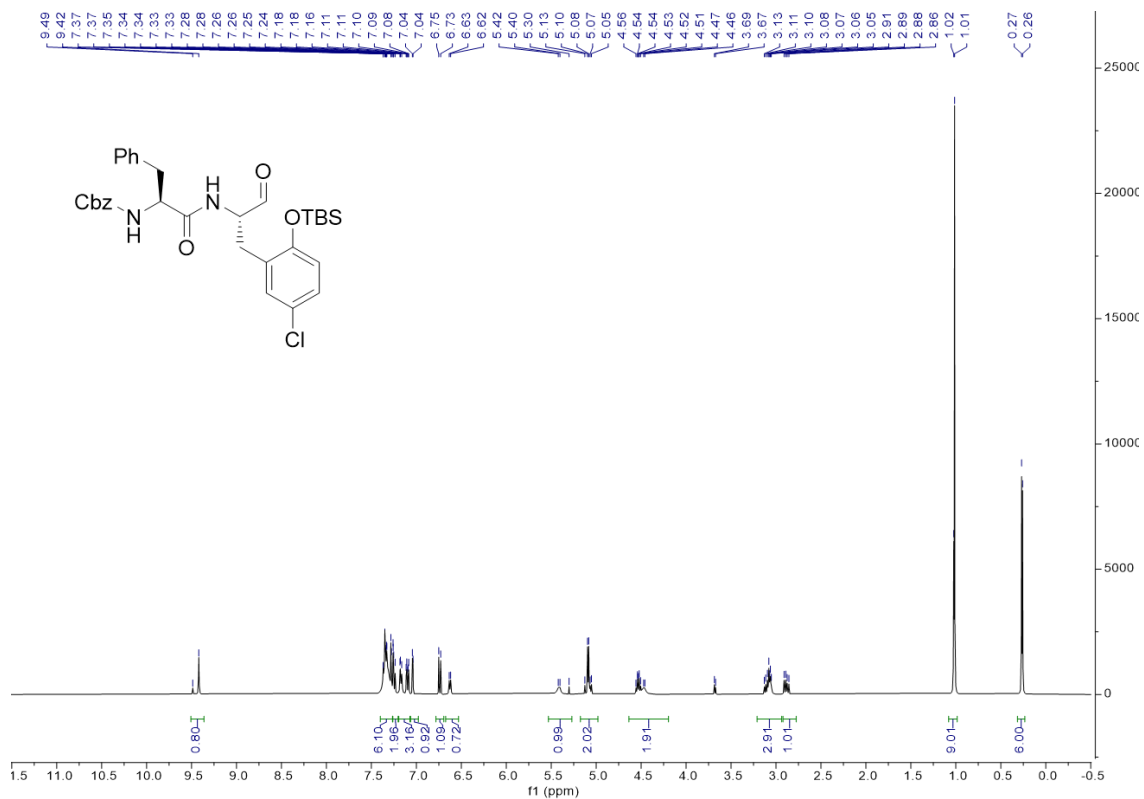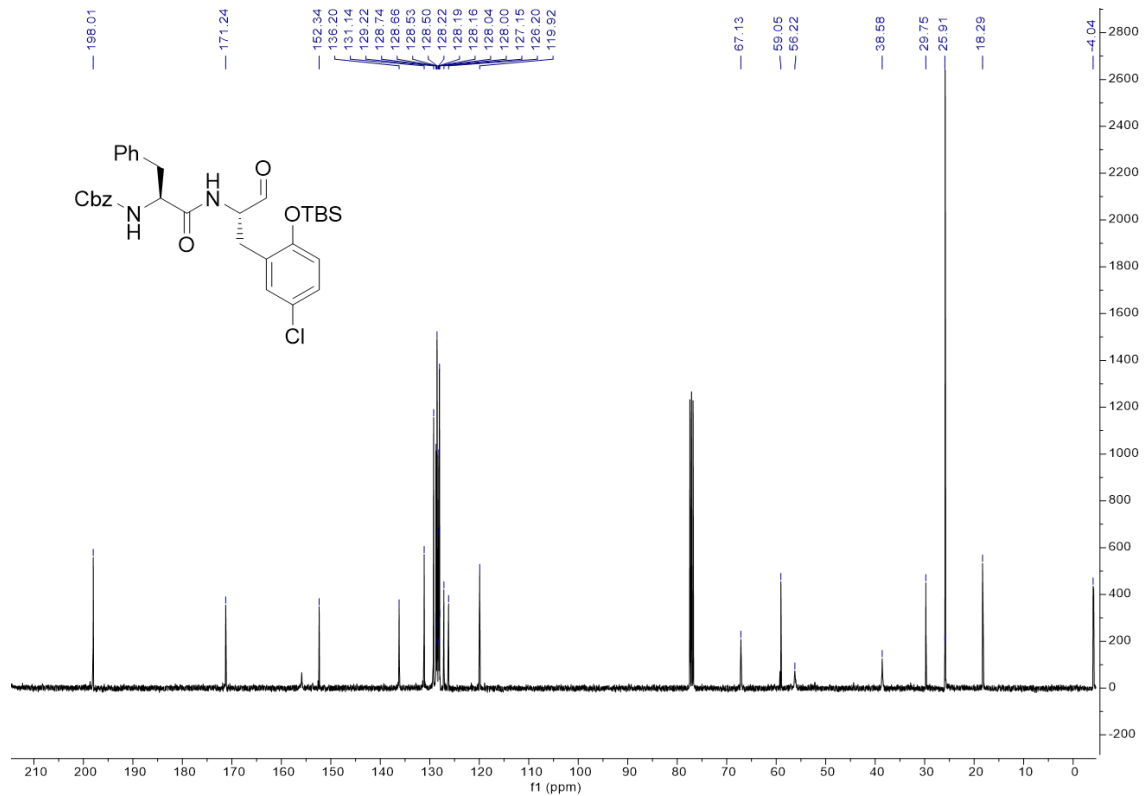

9:

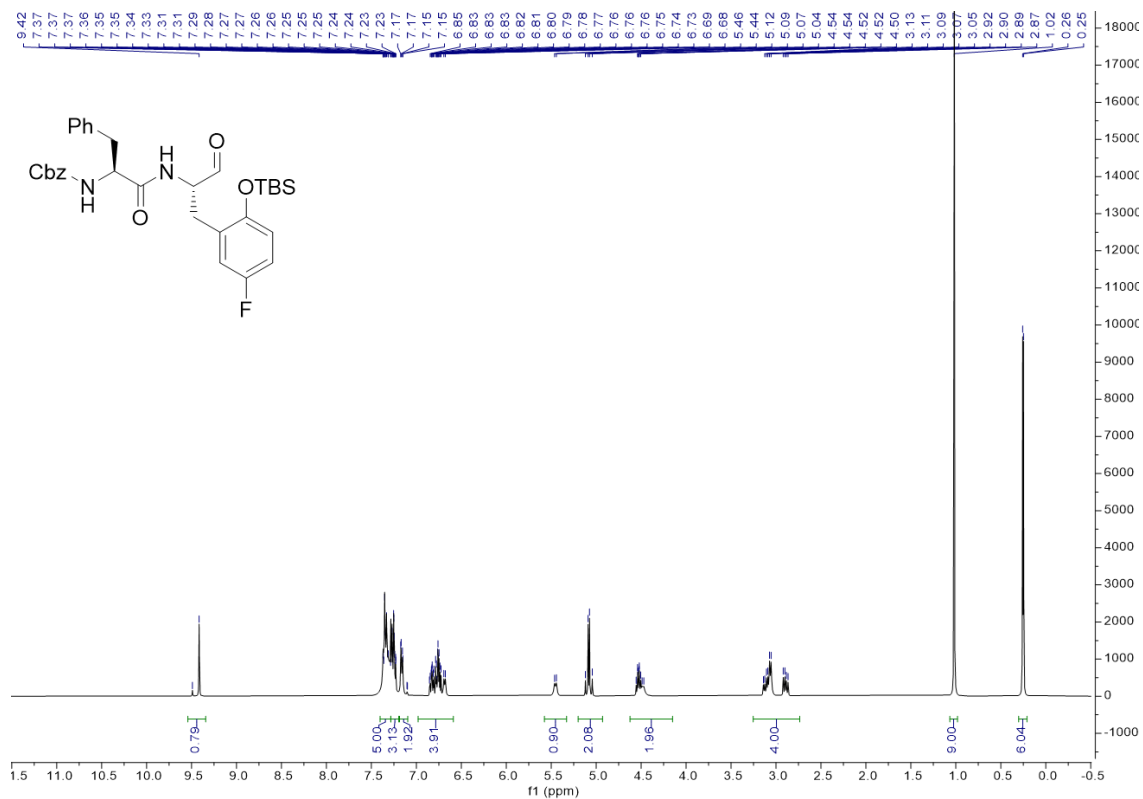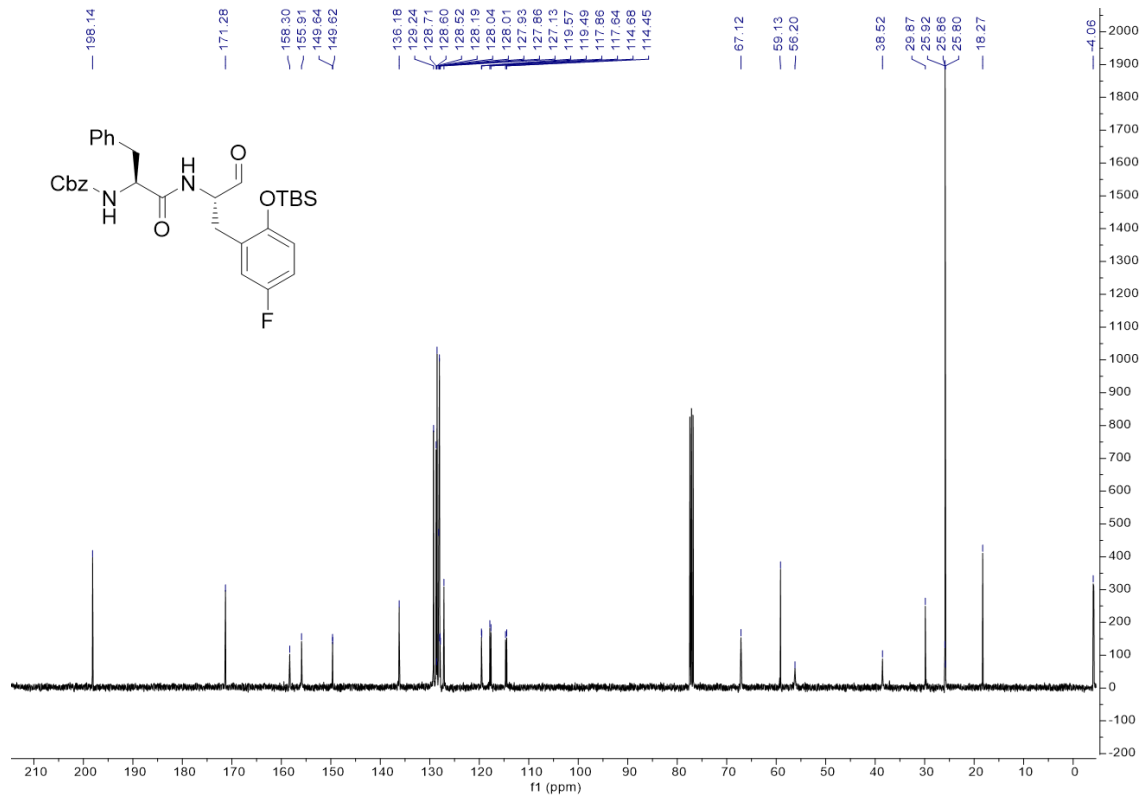



10:

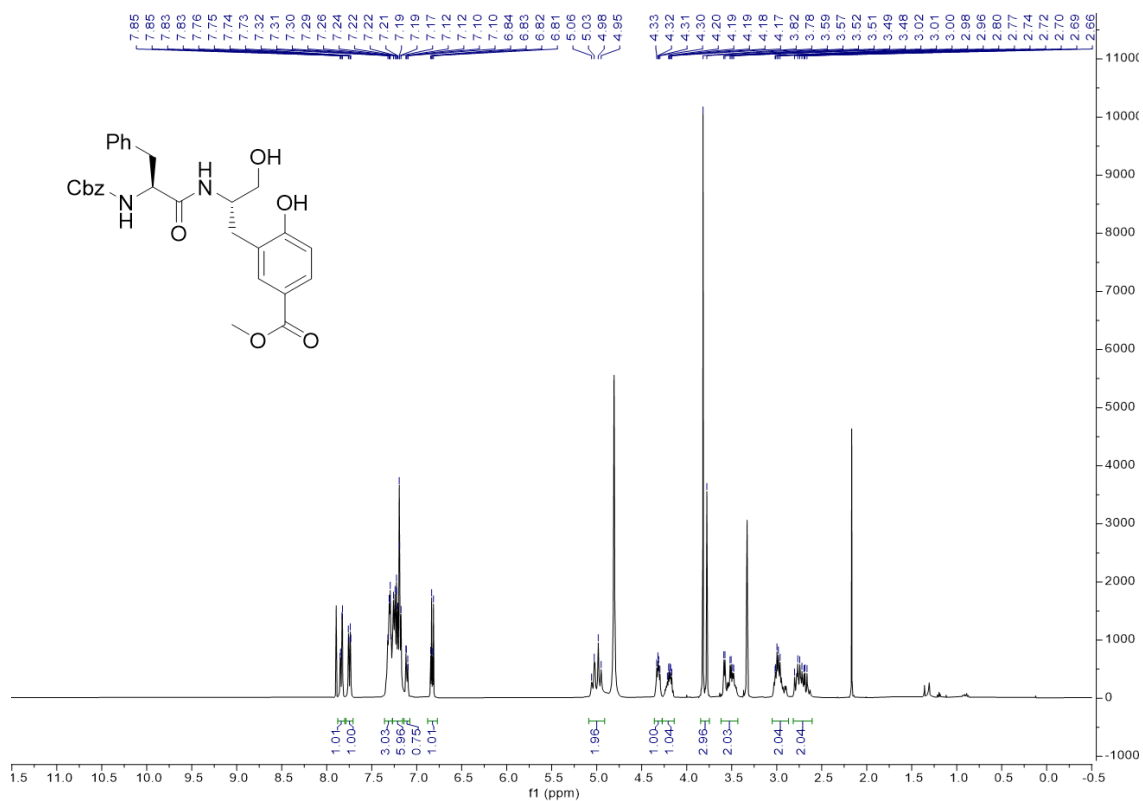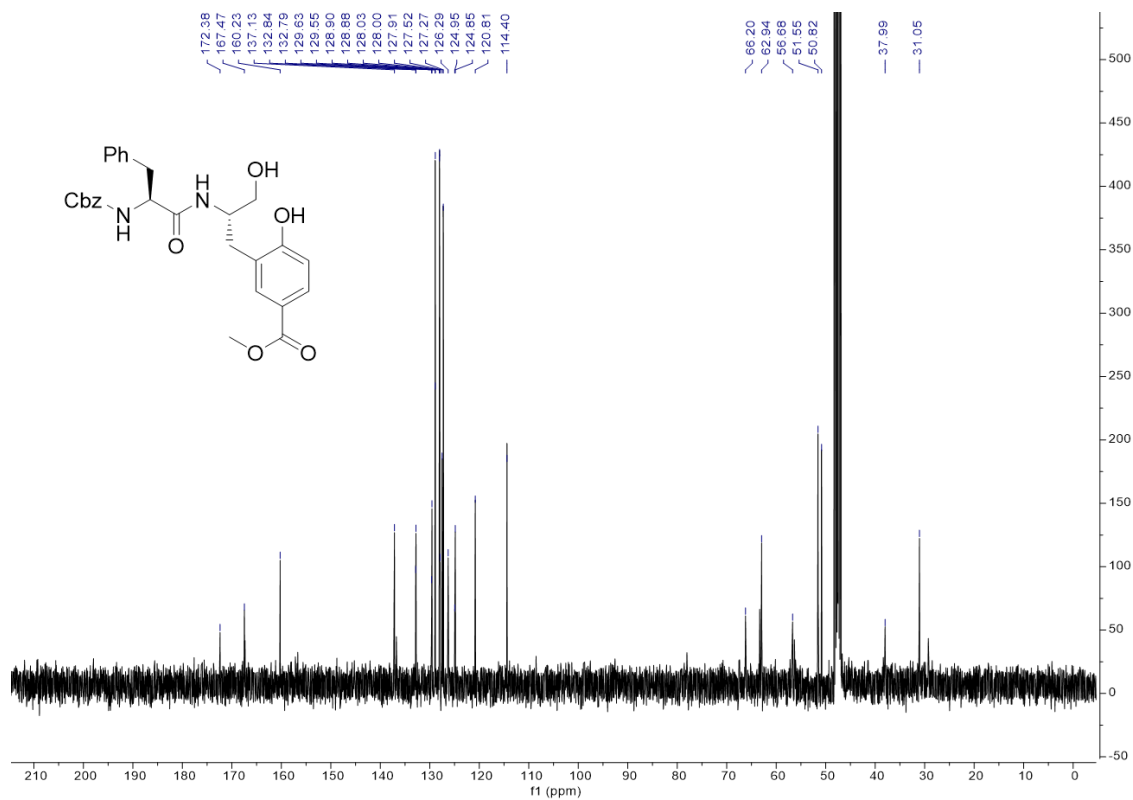

11:

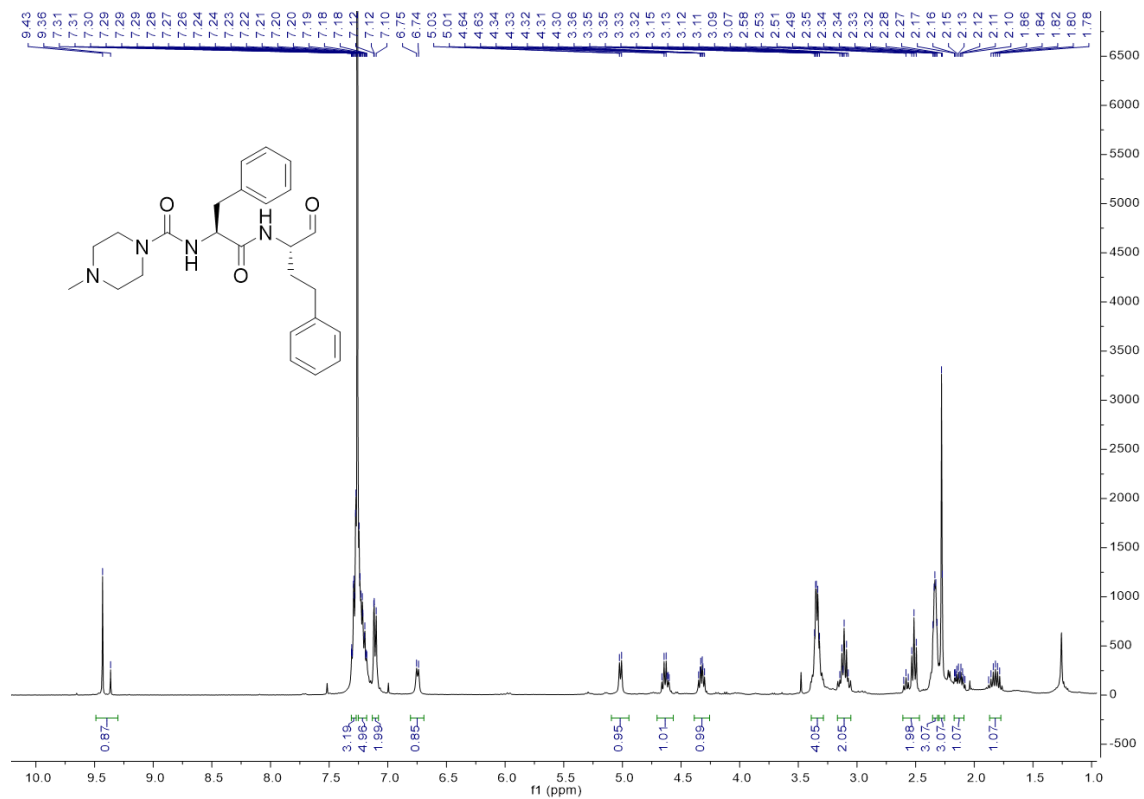

12:

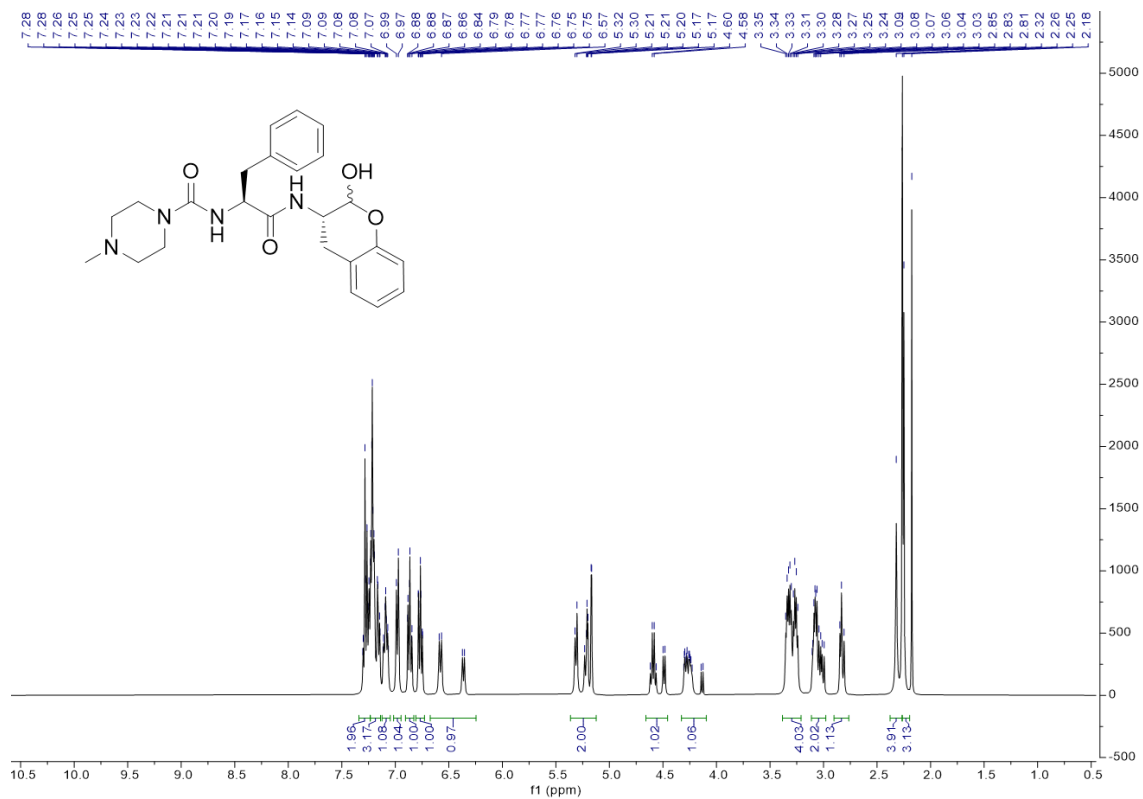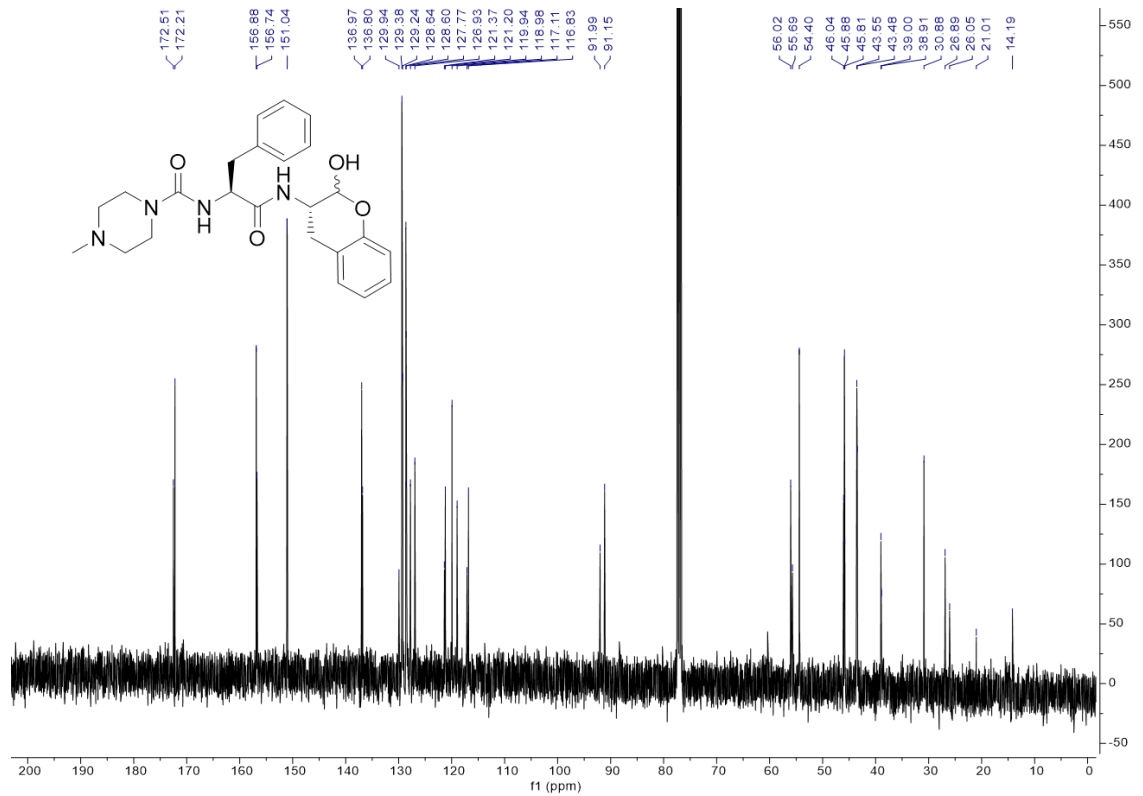

13:

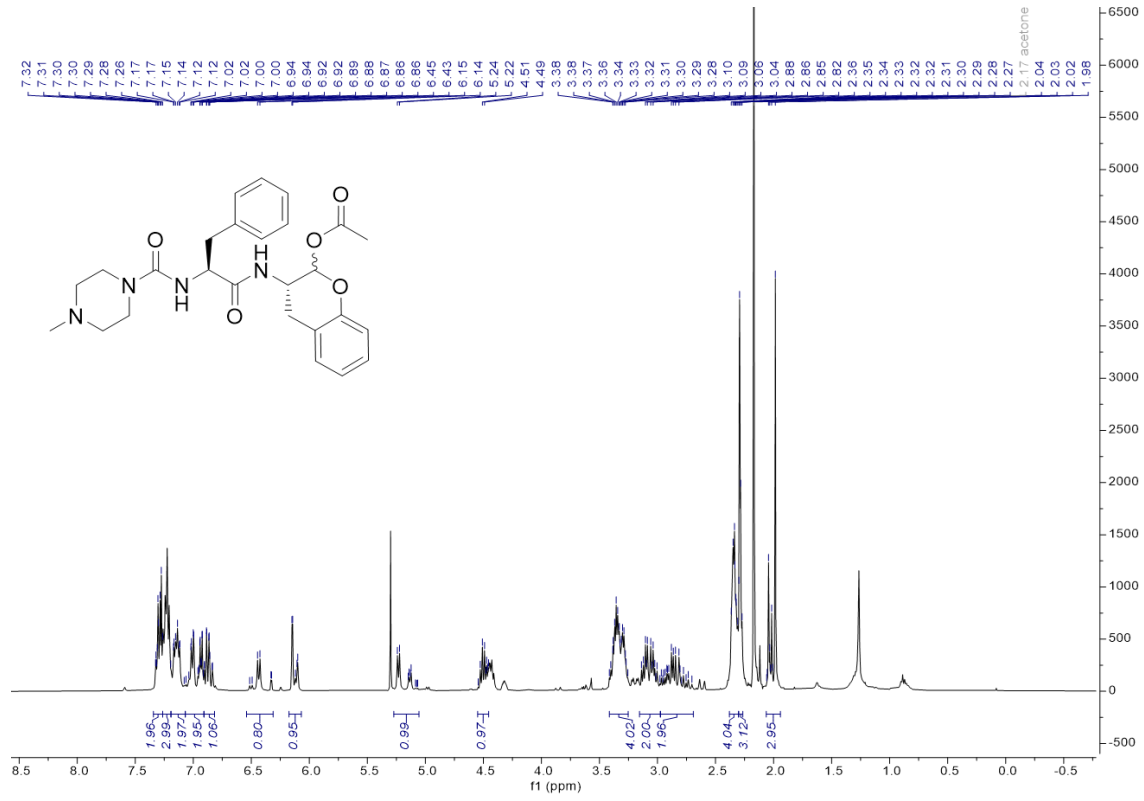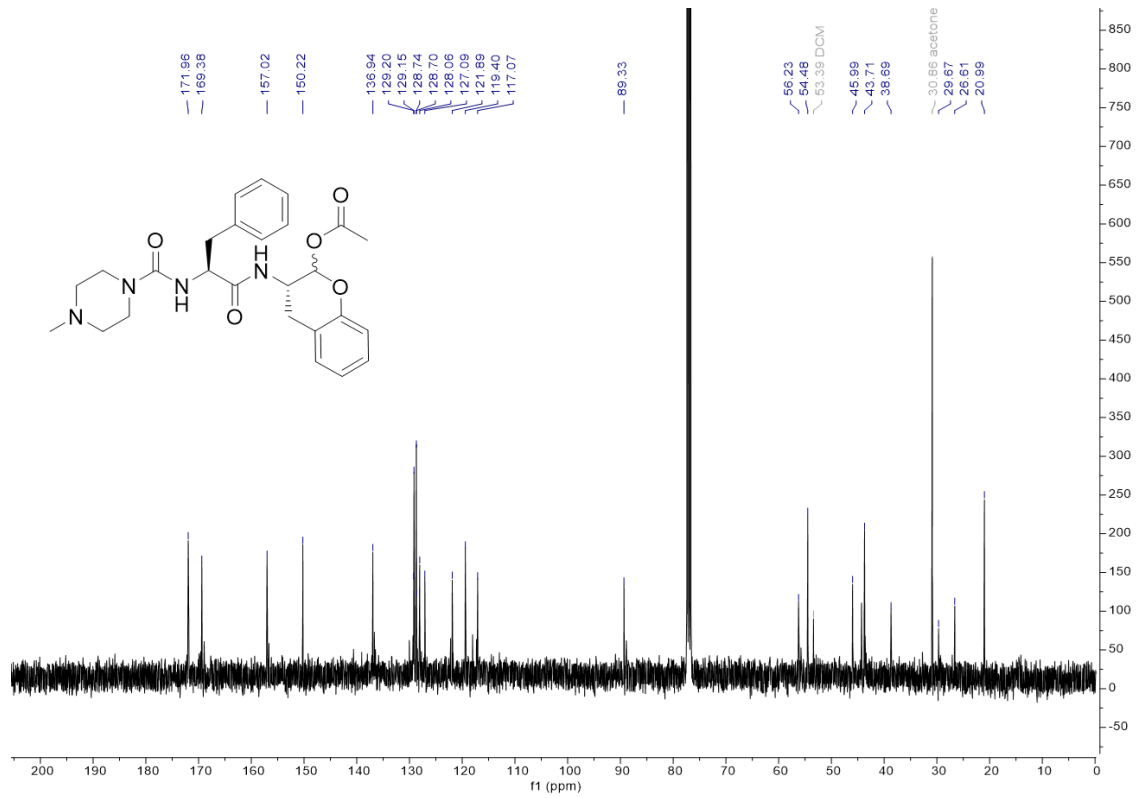

14:

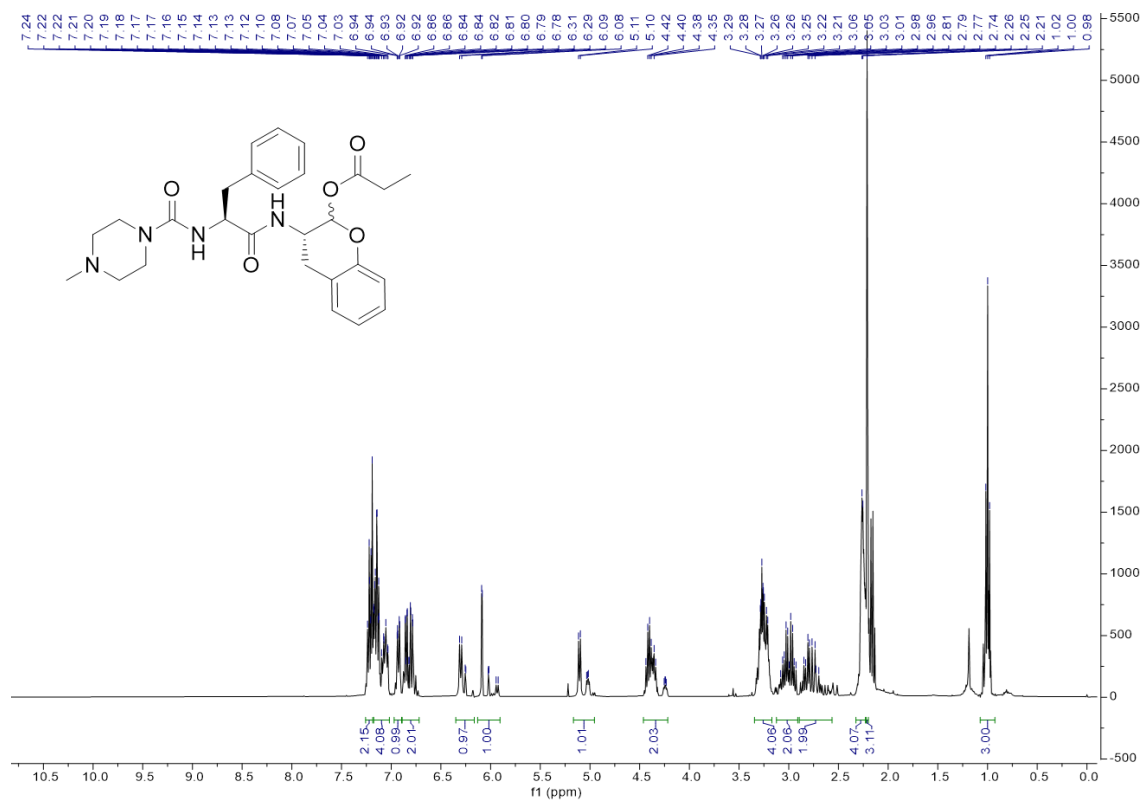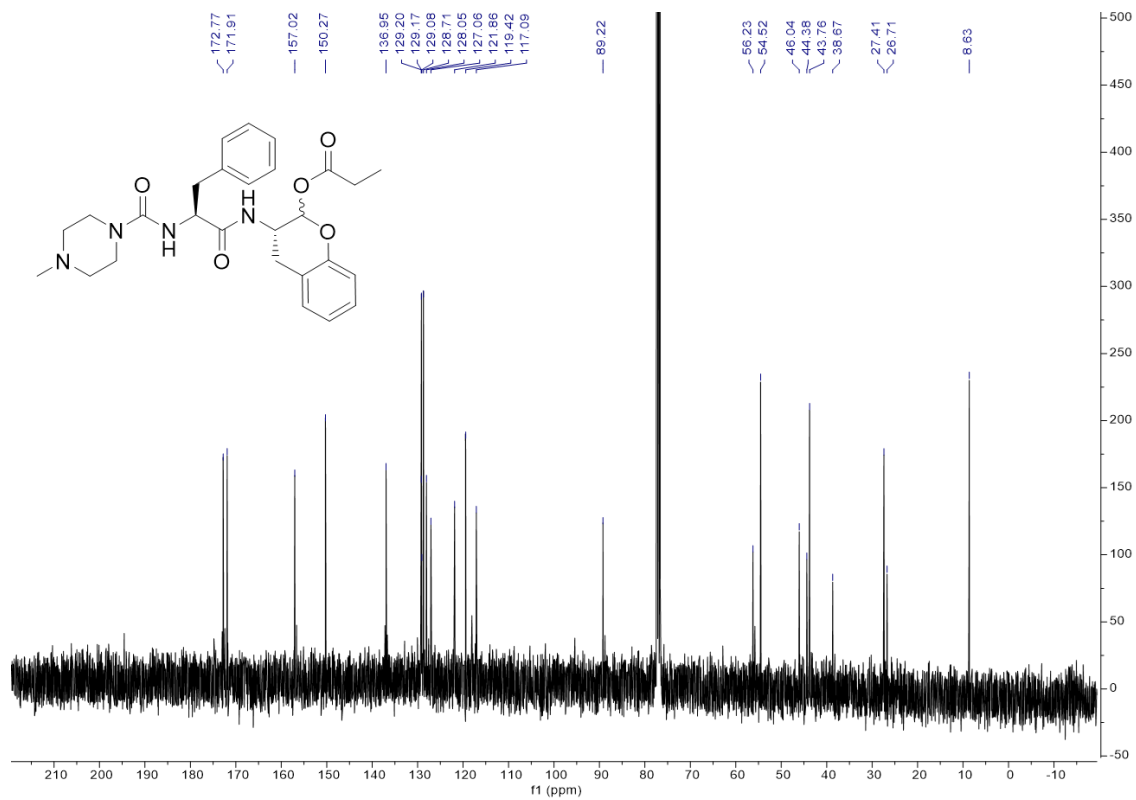

15:

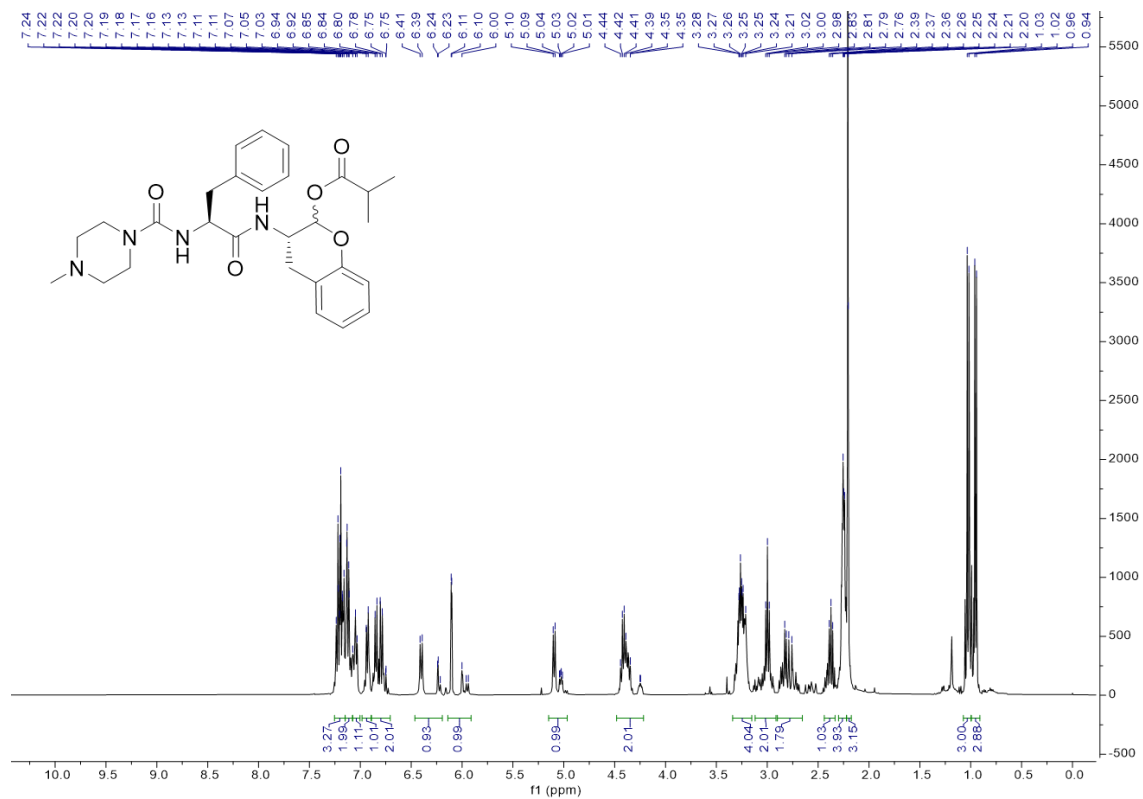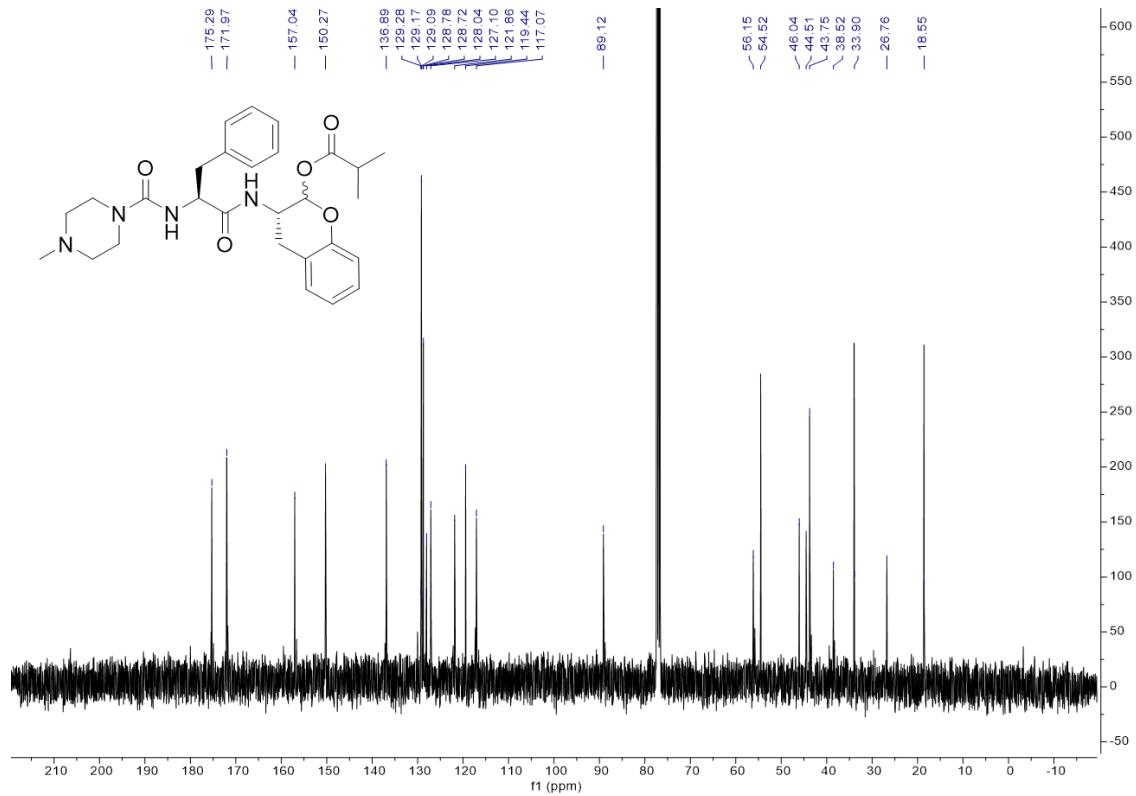

16:

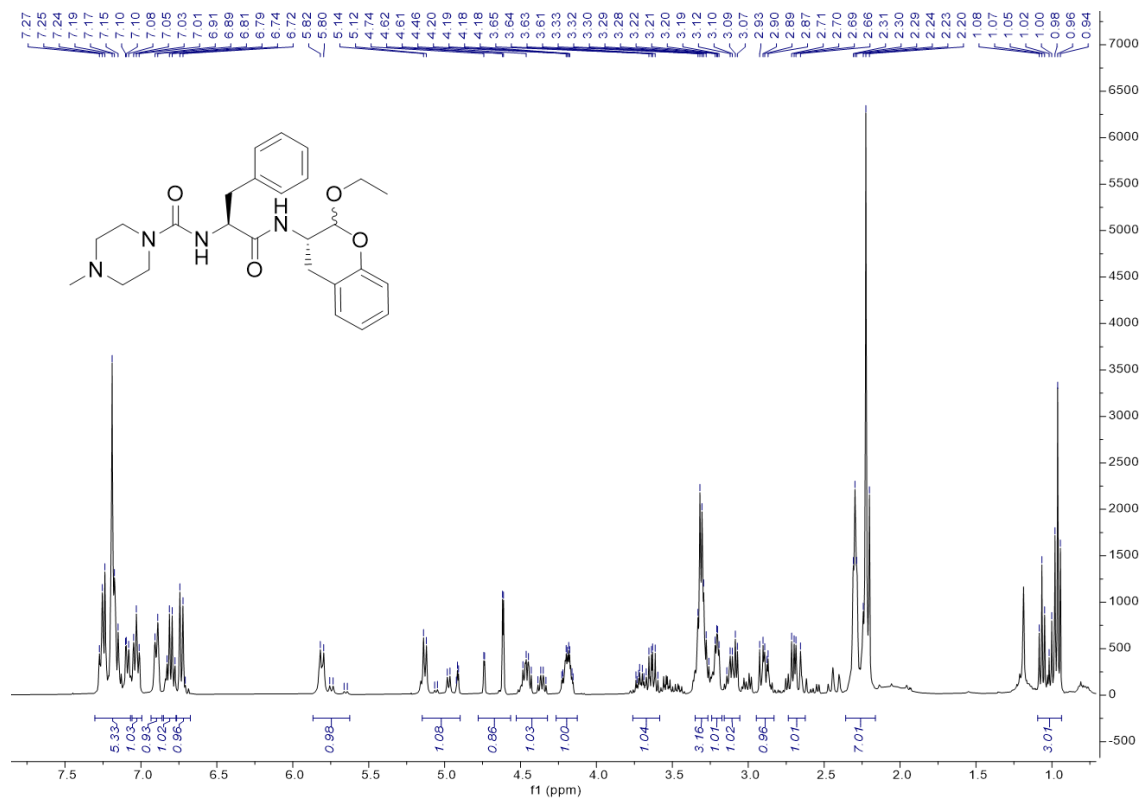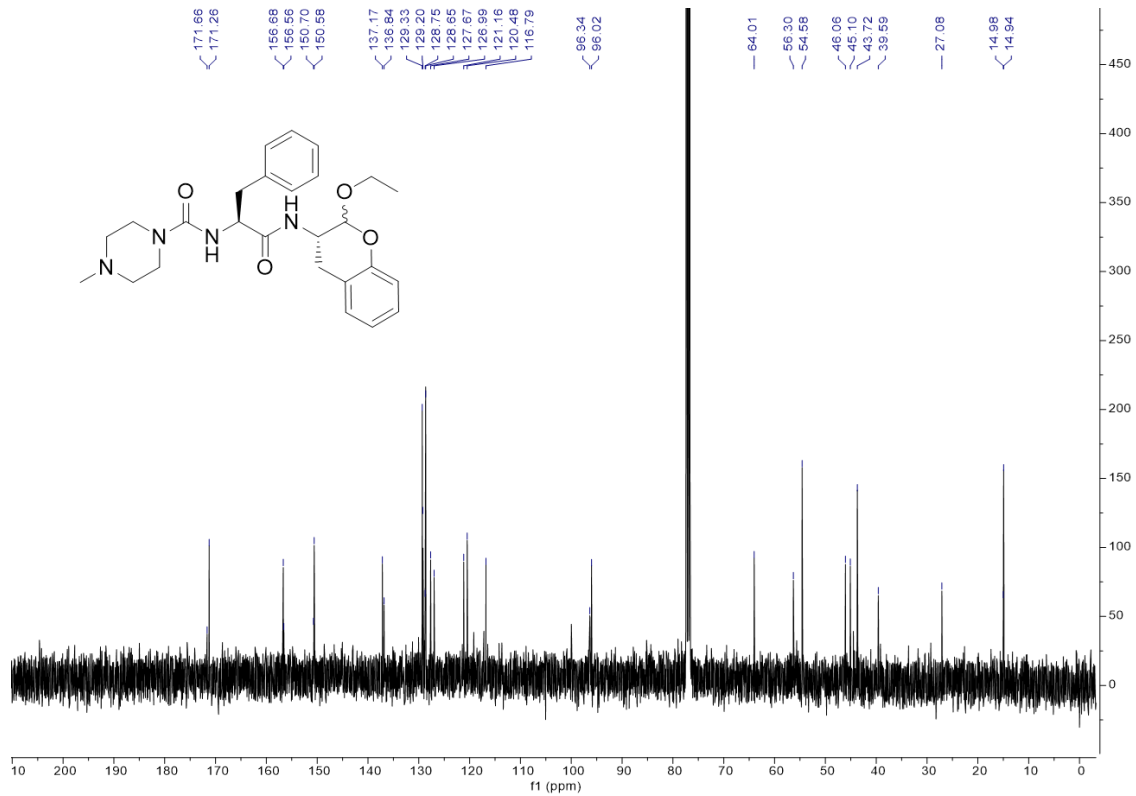

17:

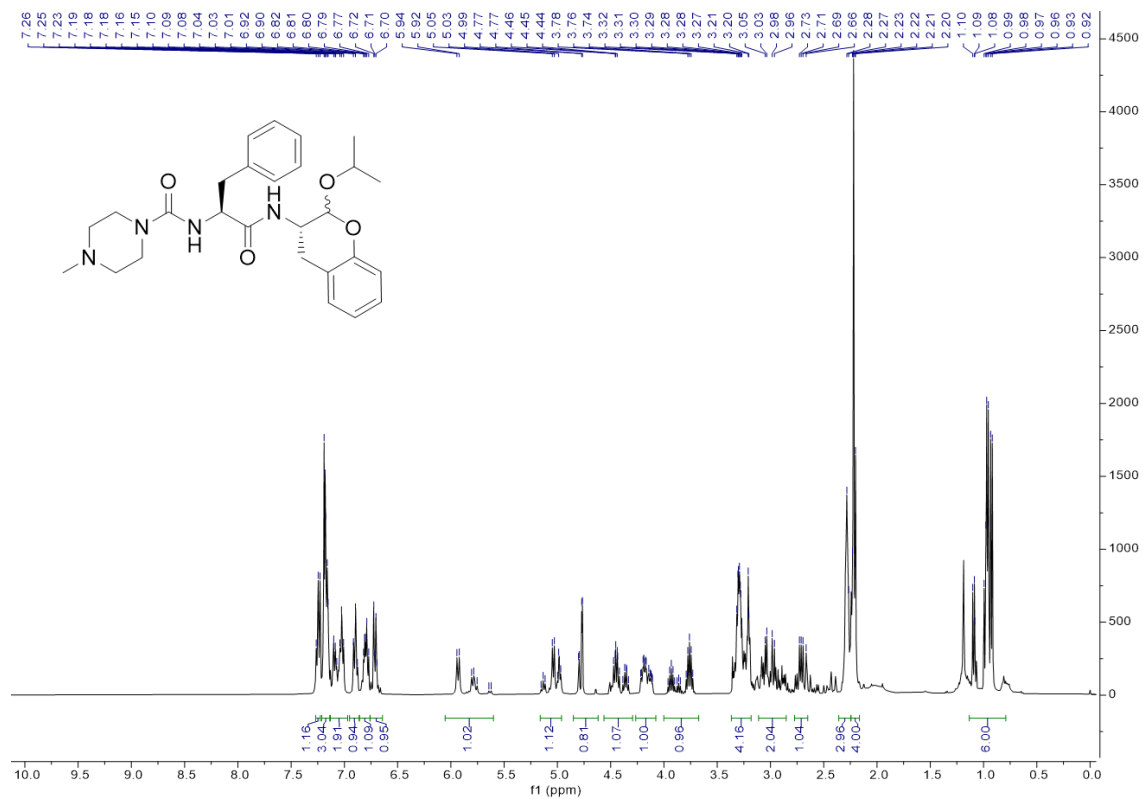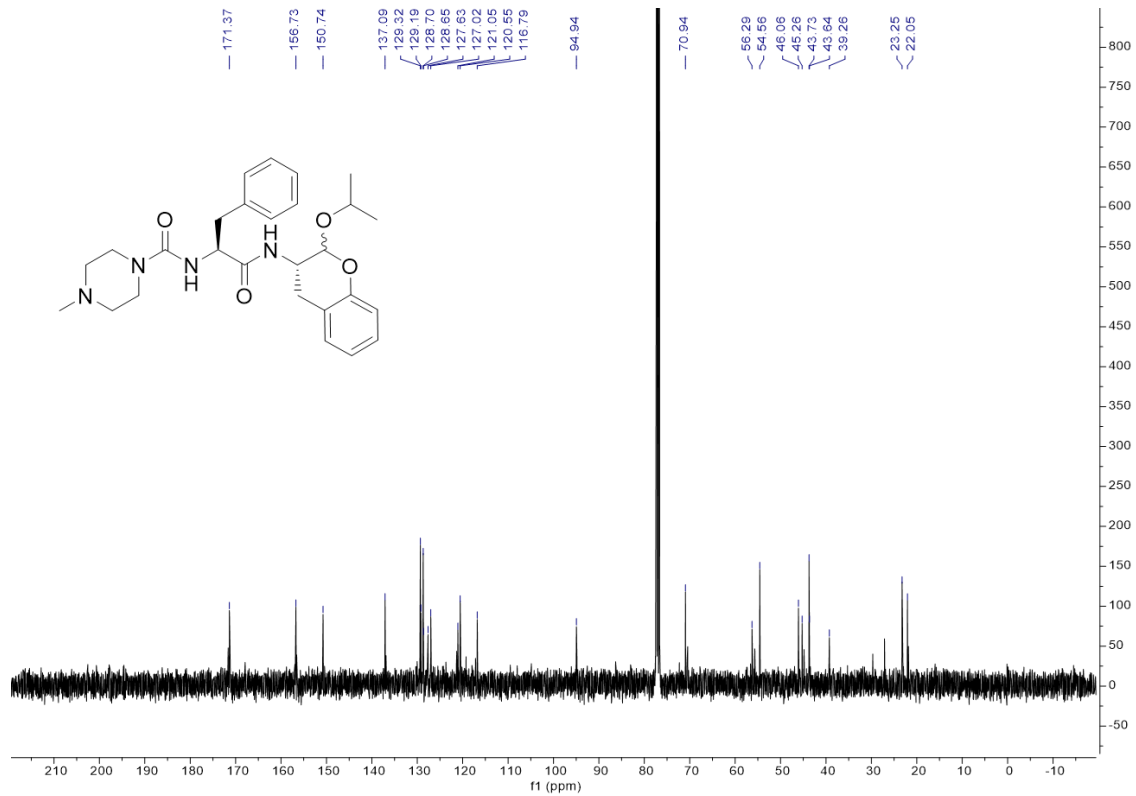



18:

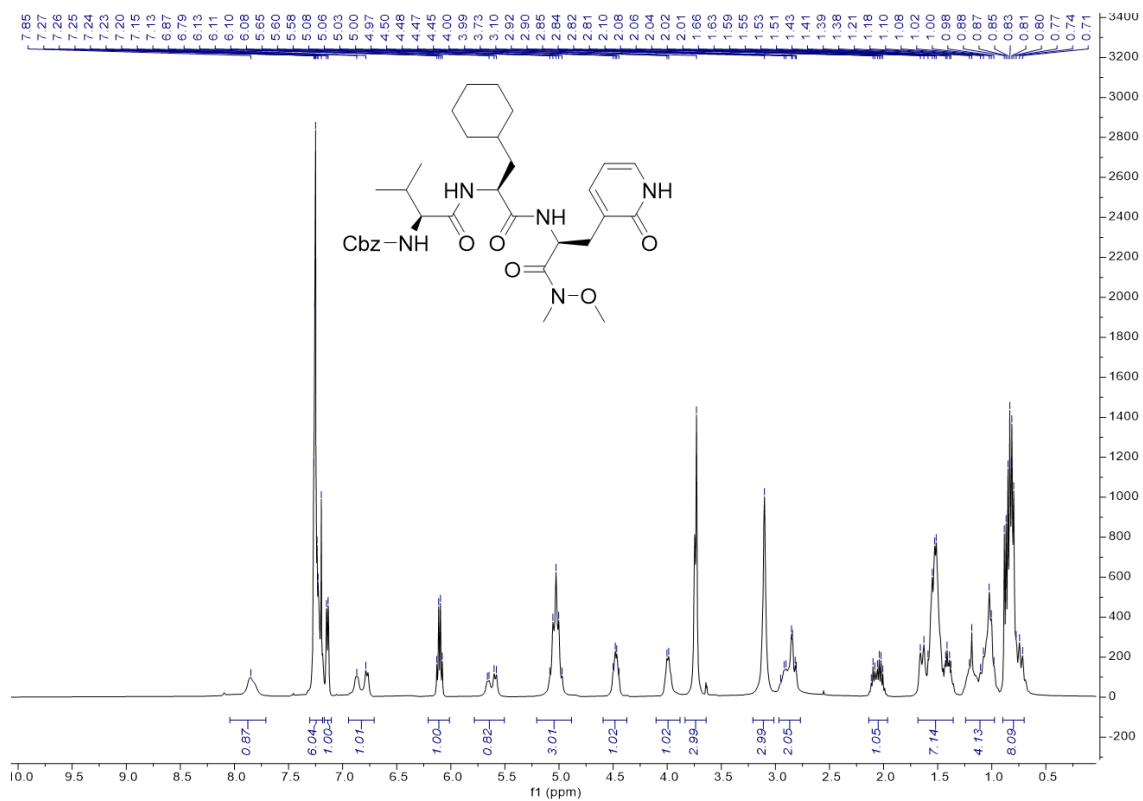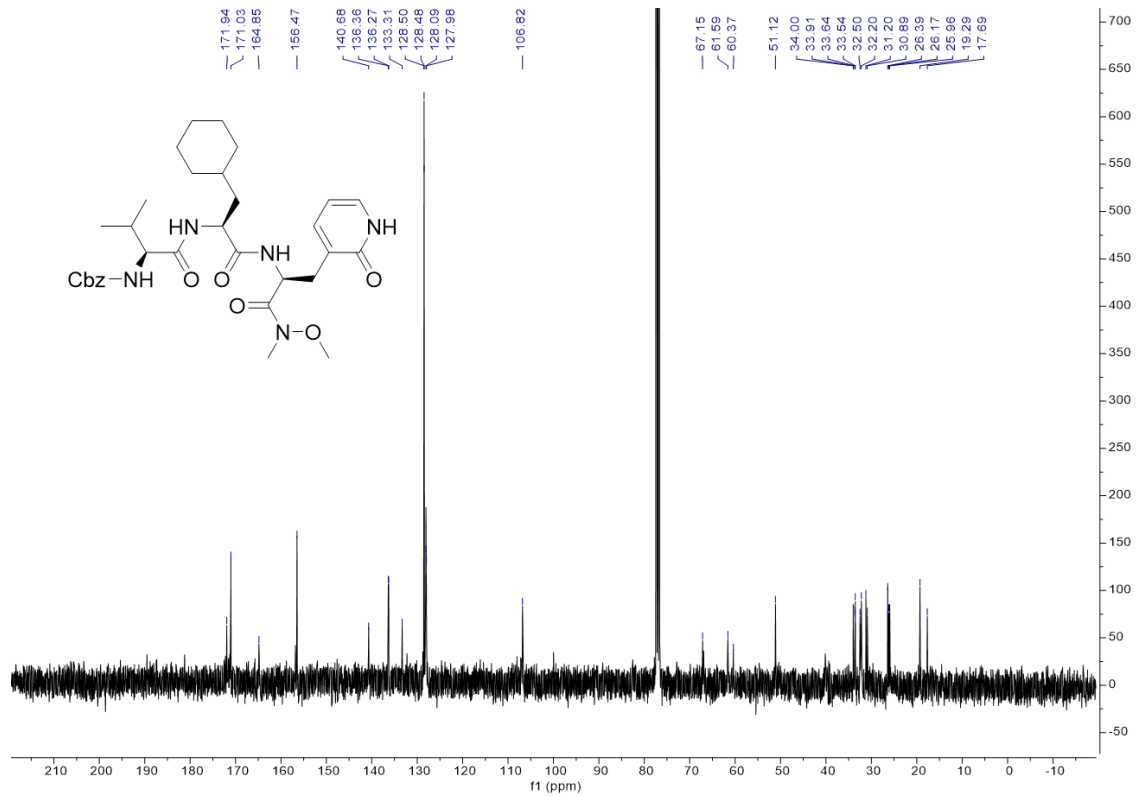

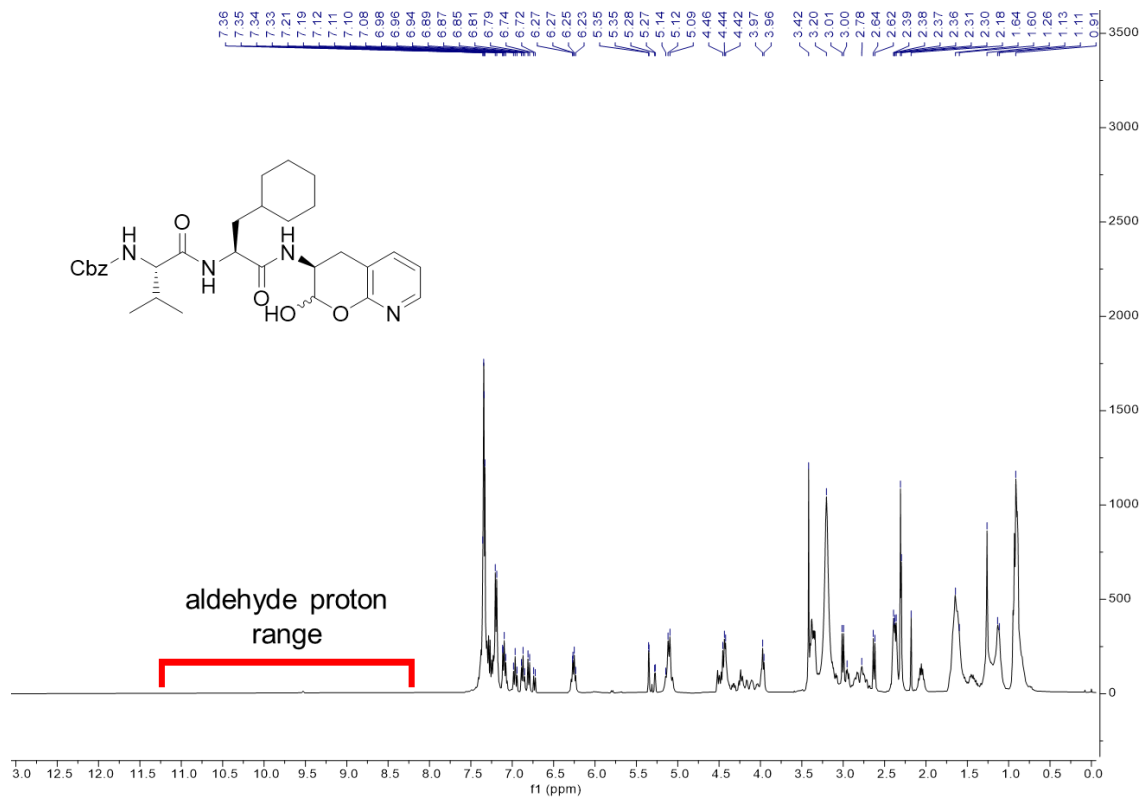

$^{13}\text{C}$ -labeled **12** in chloroform- $d_3$ :

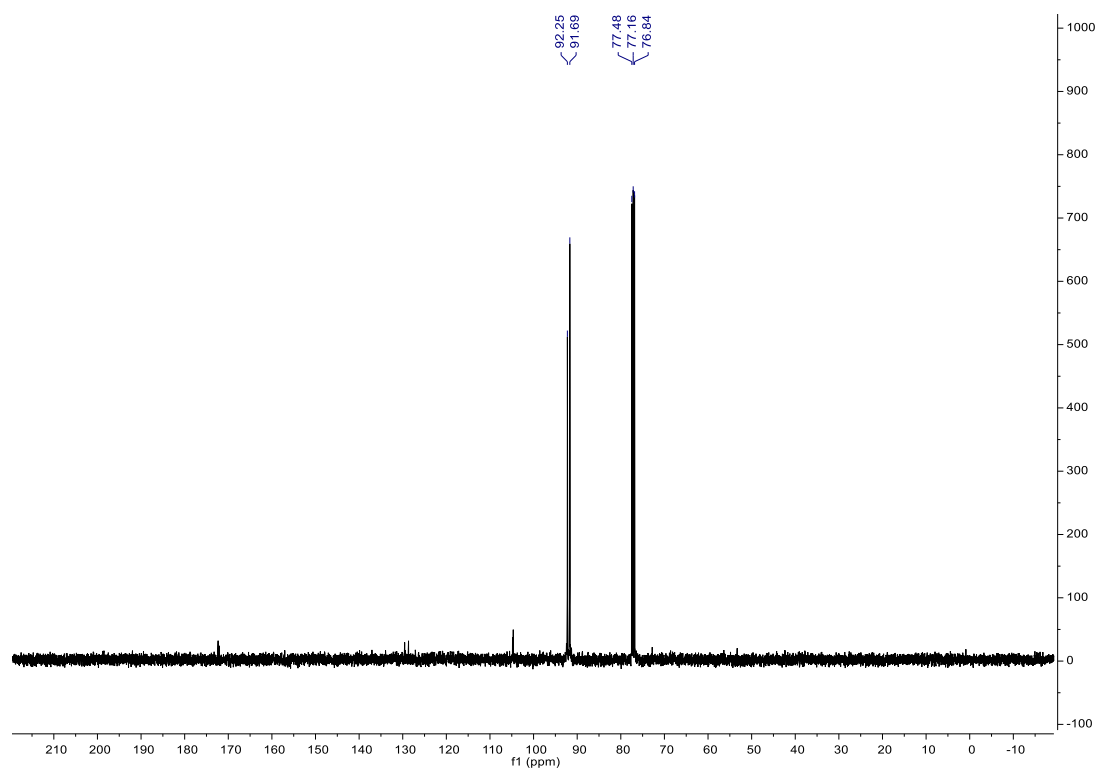

$^1\text{H}$ - $^{13}\text{C}$  HSQC NMR of  $^{13}\text{C}$ -labeled **12** with and without cruzain in buffer (full view):

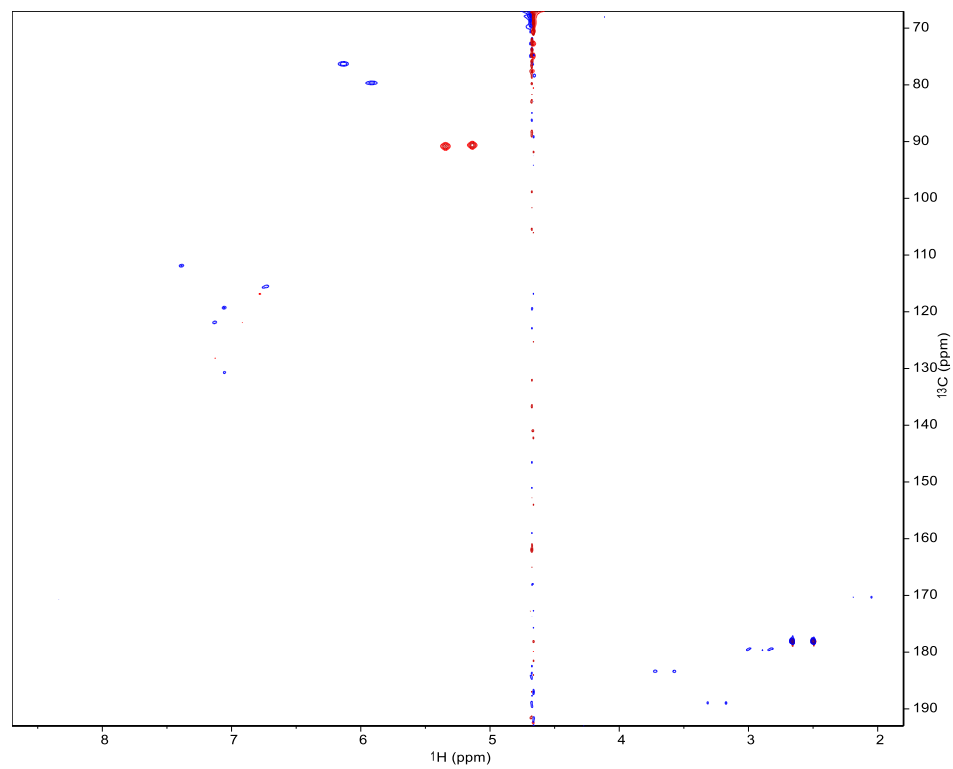

## HPLC traces and MS data

2: exact mass = 446.18

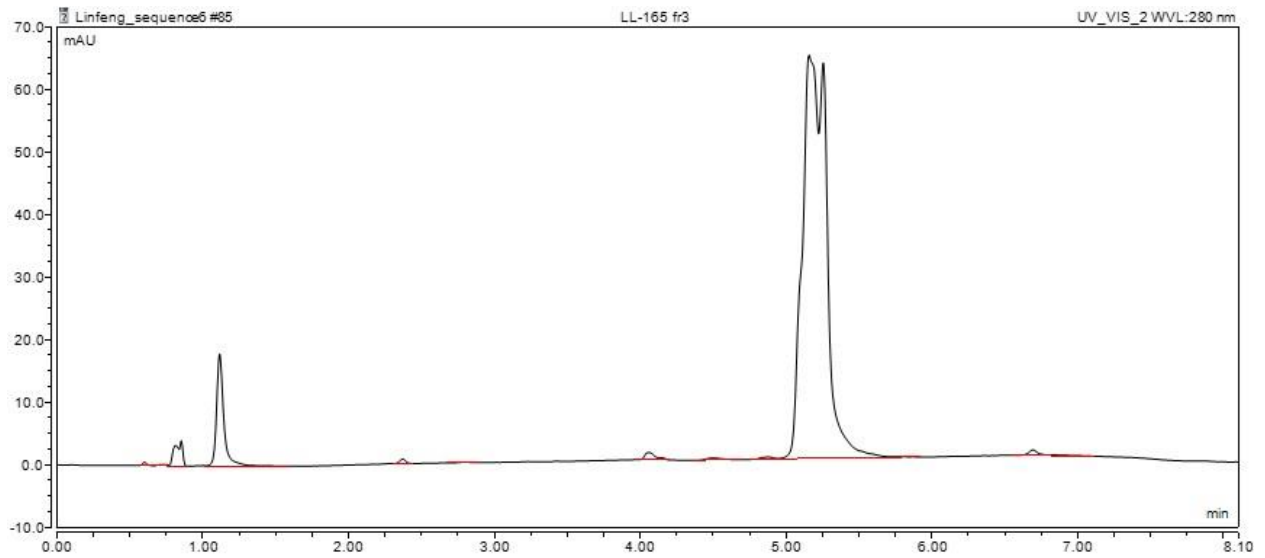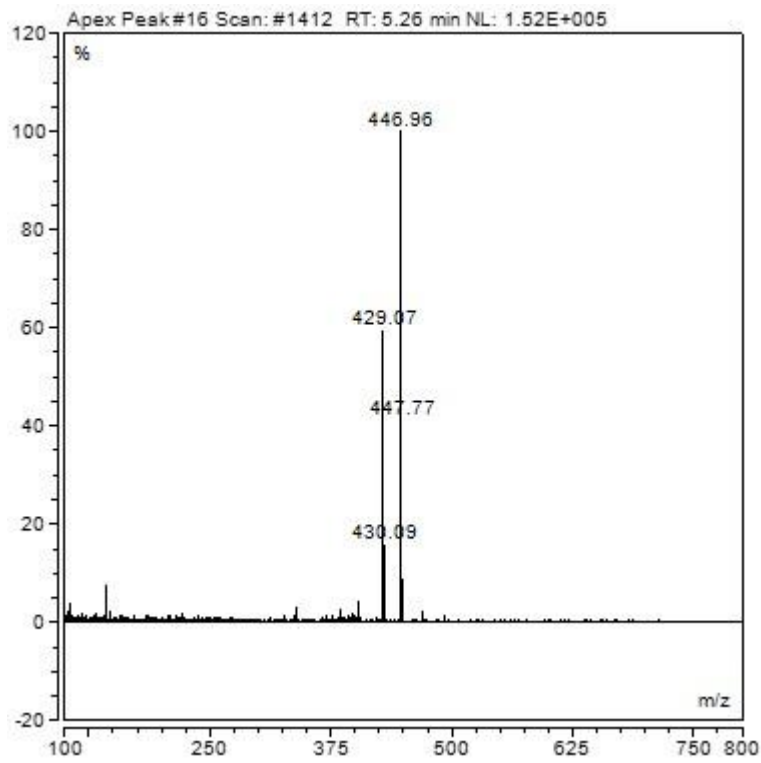

3: exact mass = 436.25

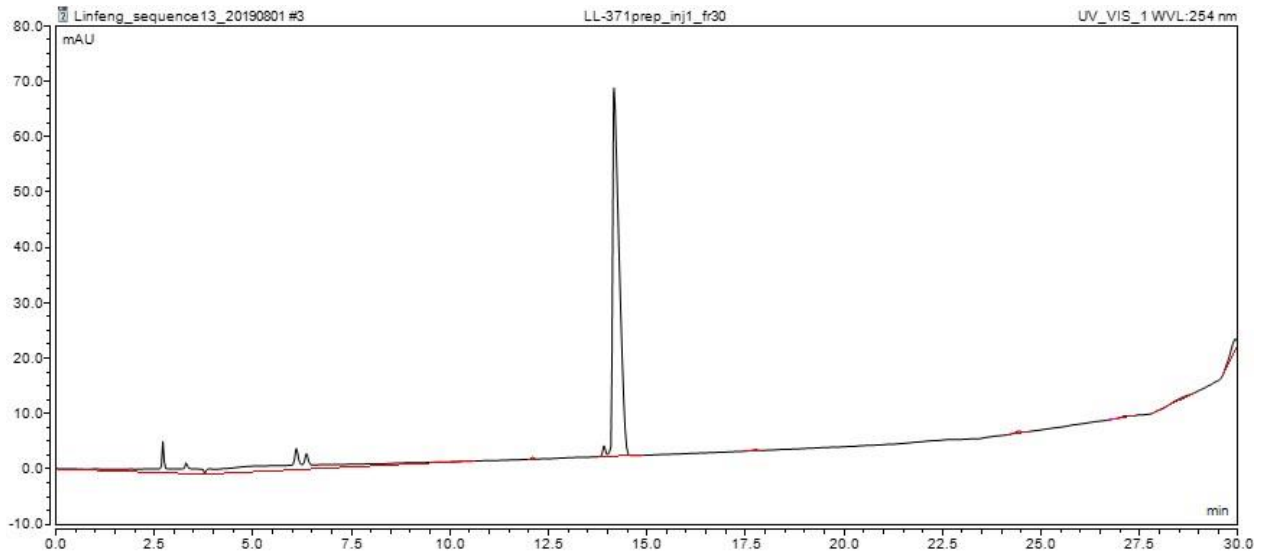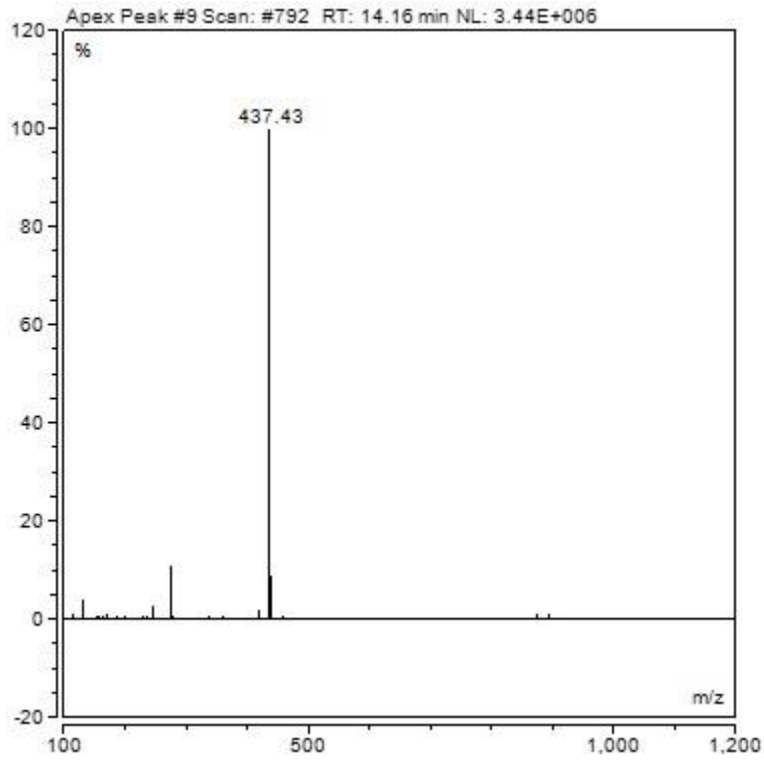

4: exact mass = 448.20

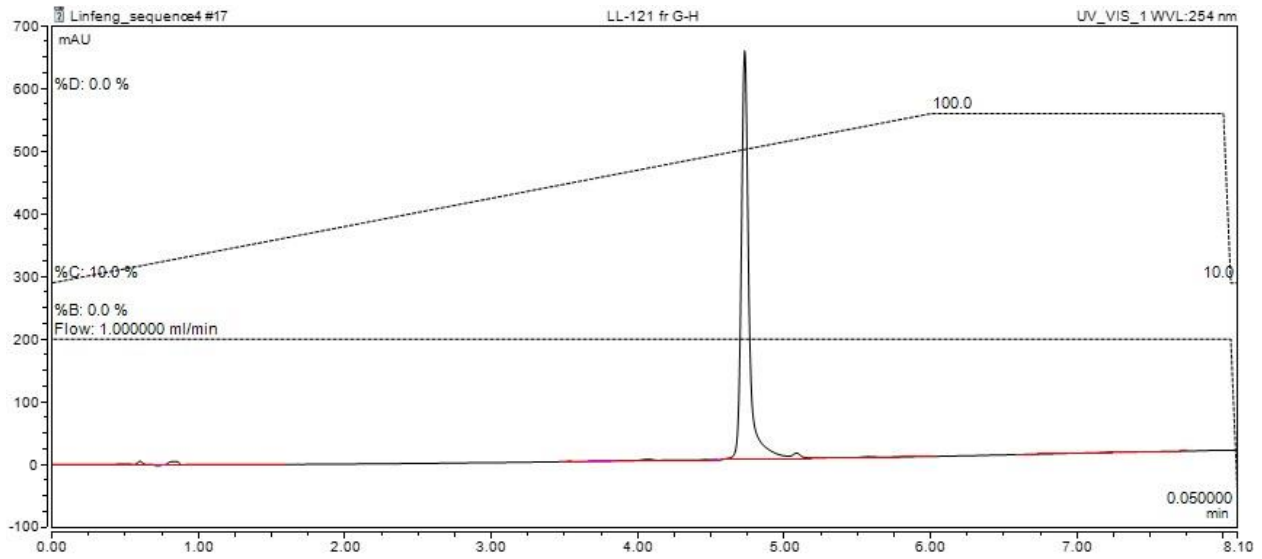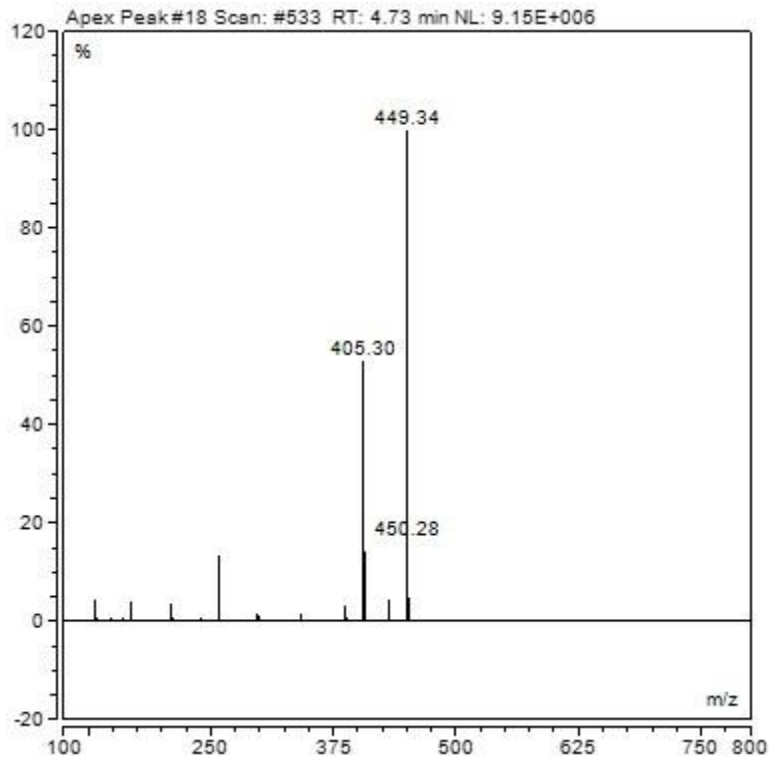

5: exact mass = 460.20

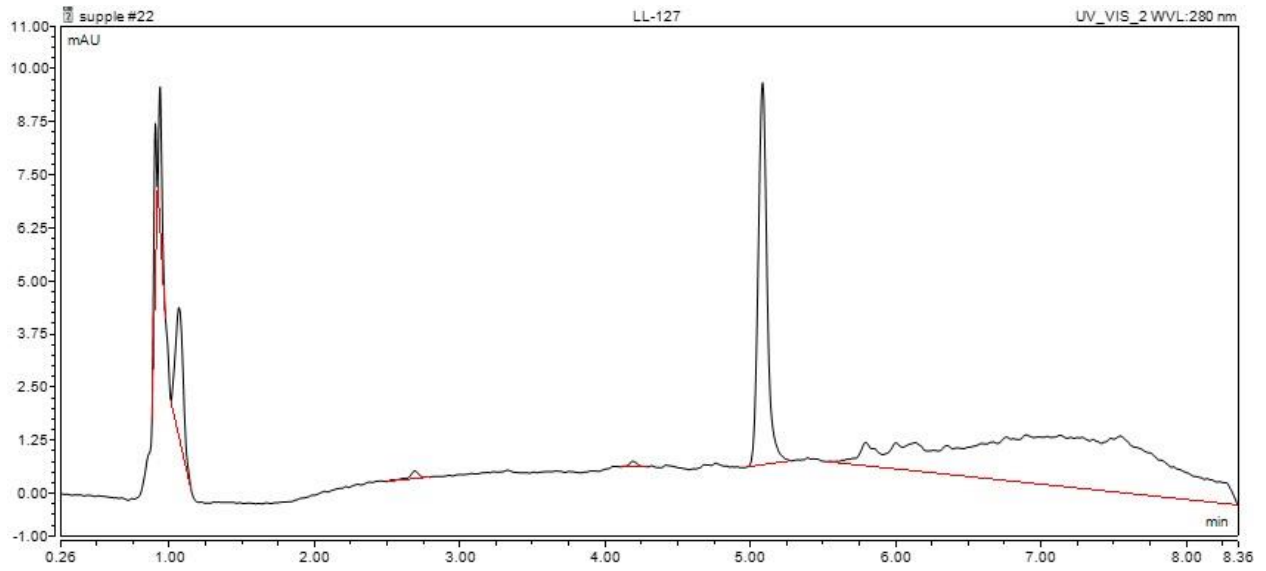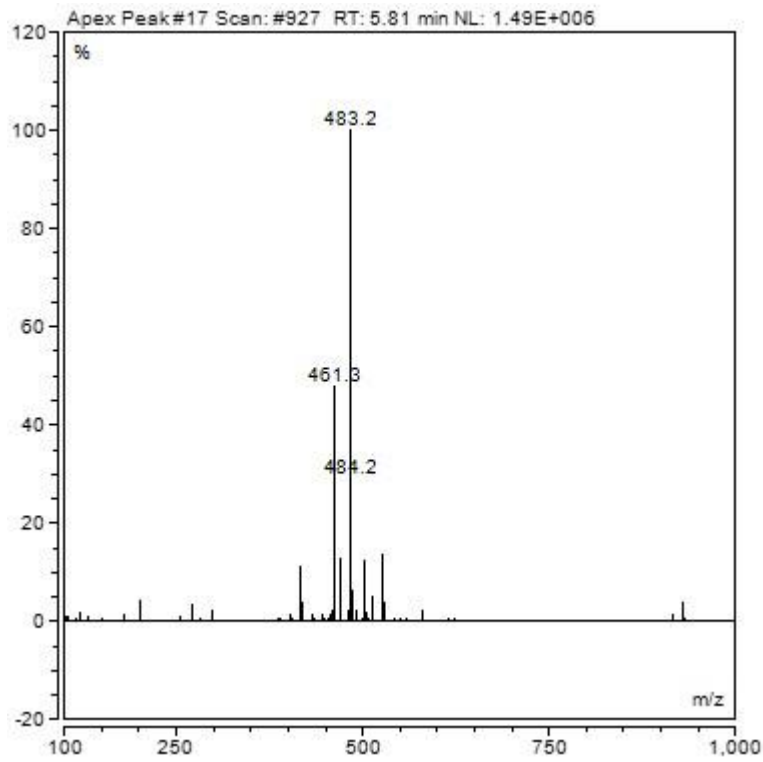

6: exact mass = 476.19

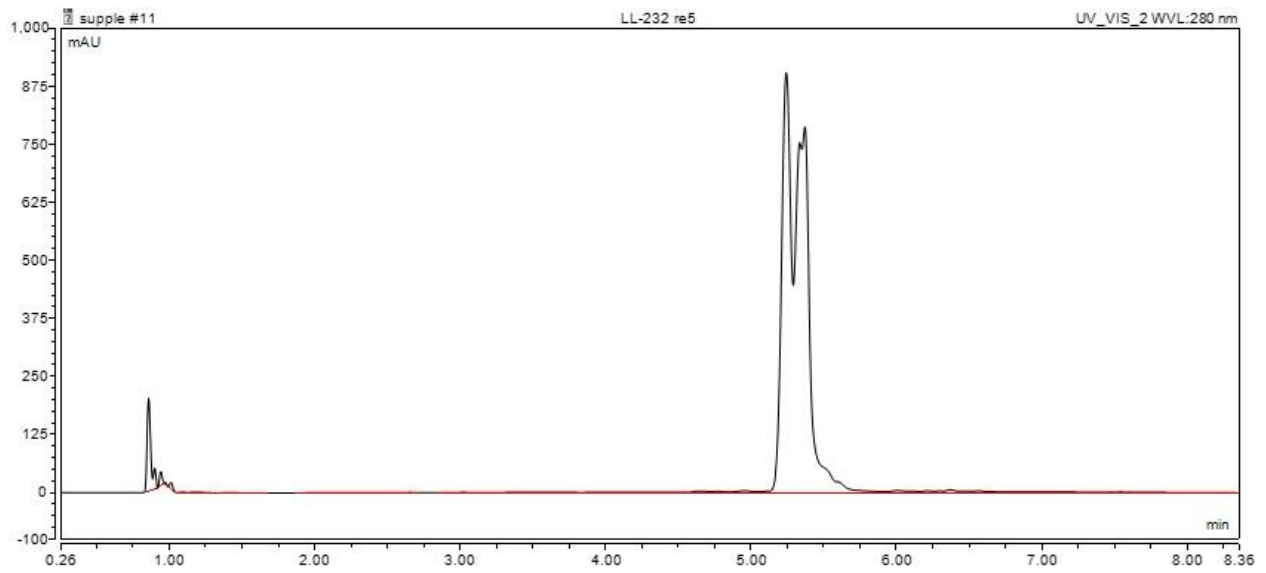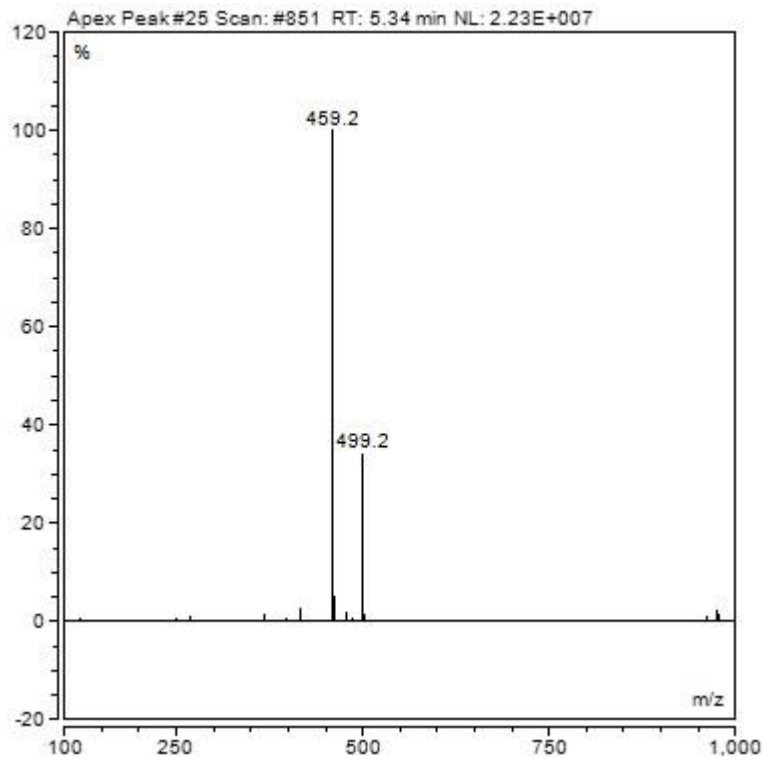



7: exact mass = 460.20

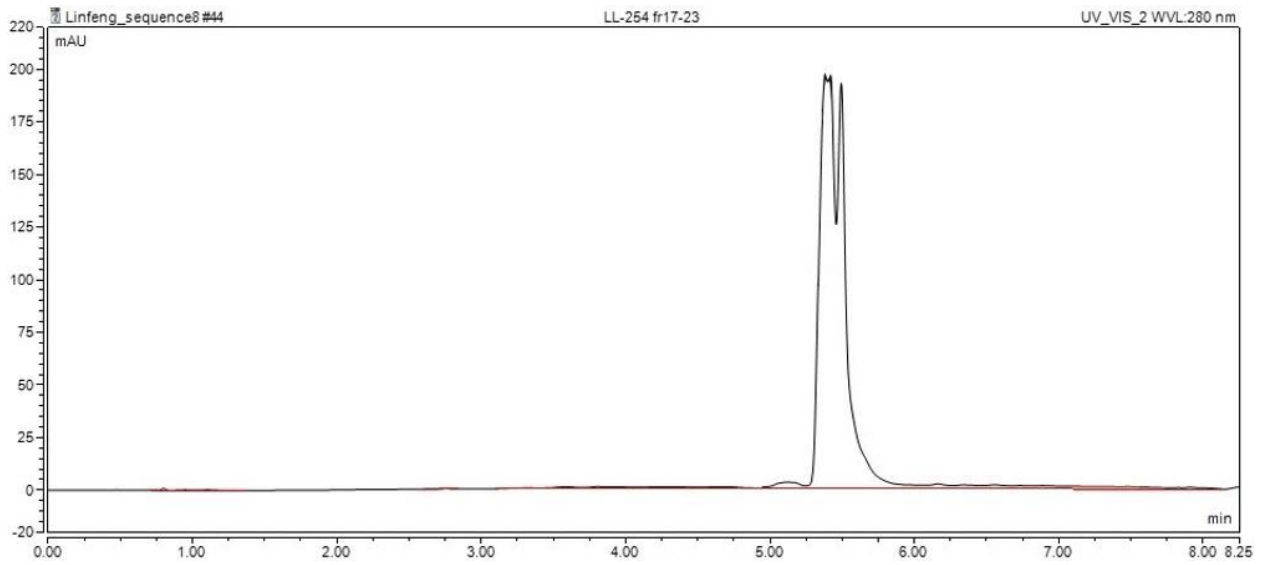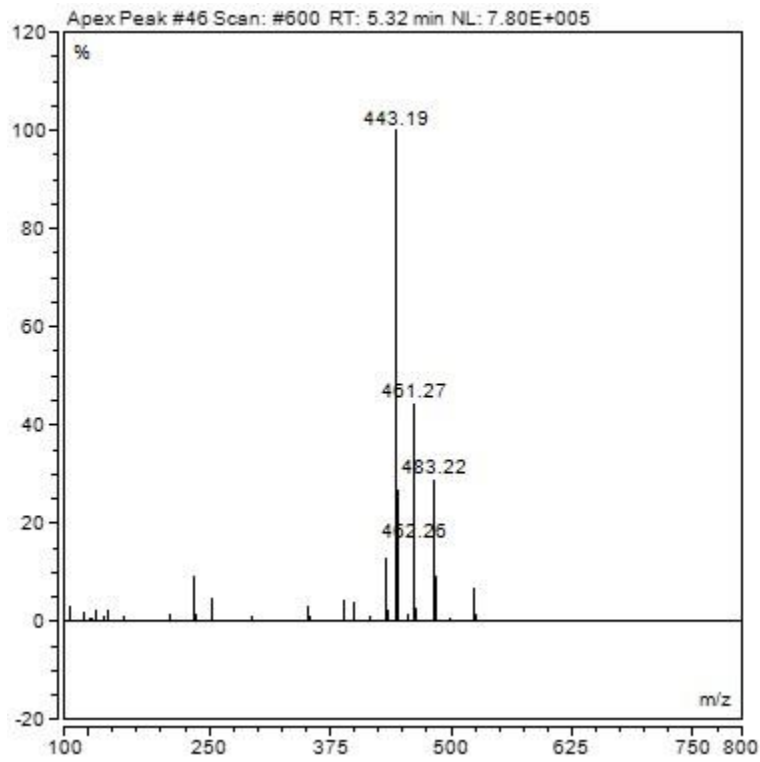

8: exact mass = 480.16

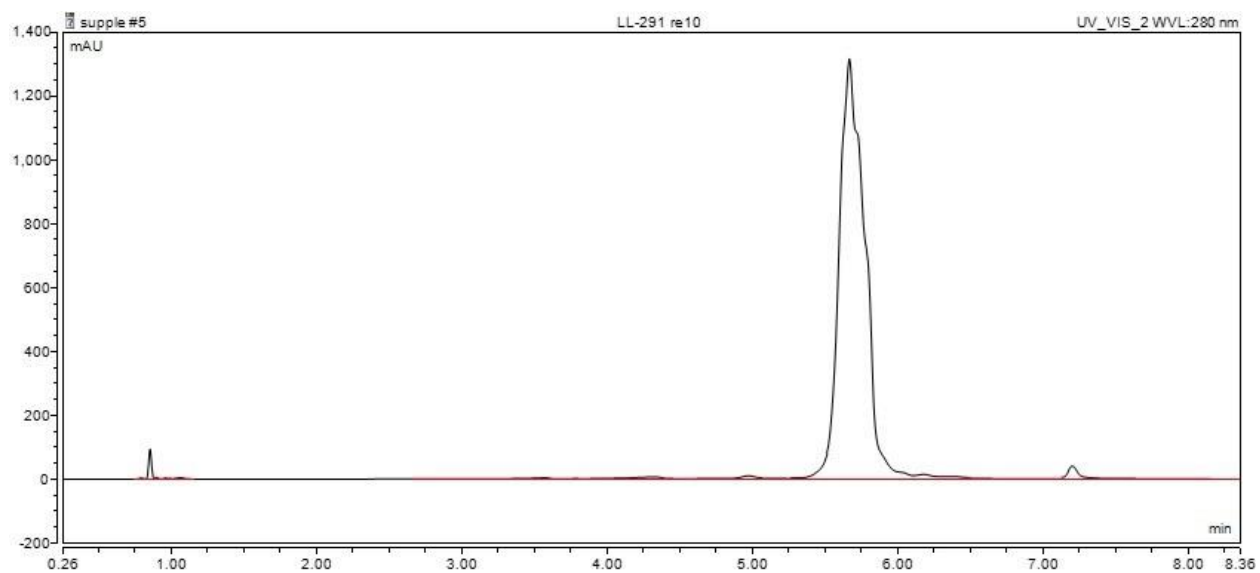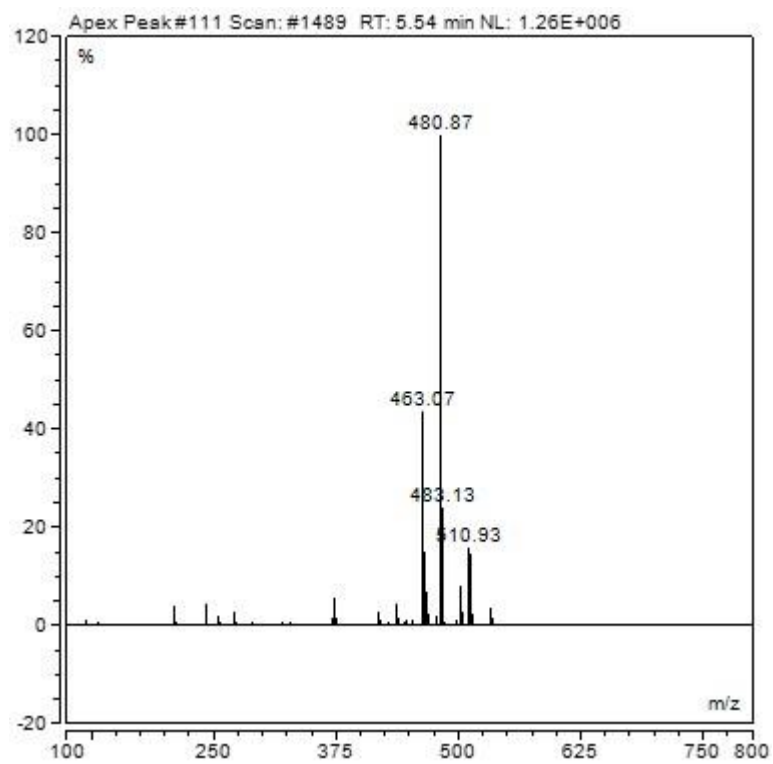

9: exact mass = 464.17

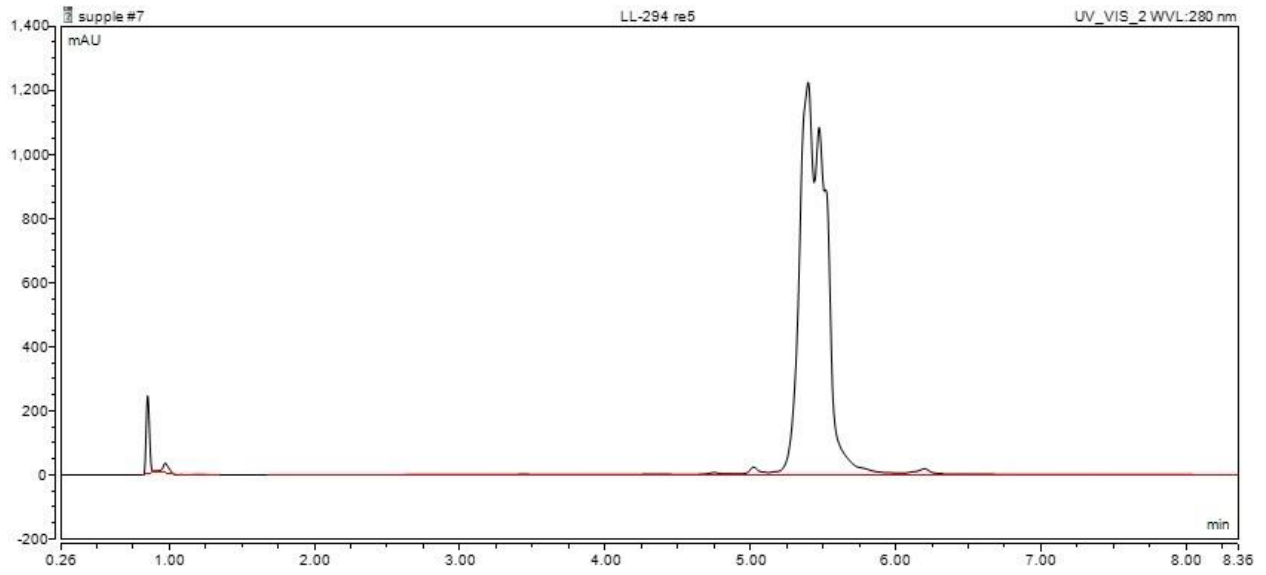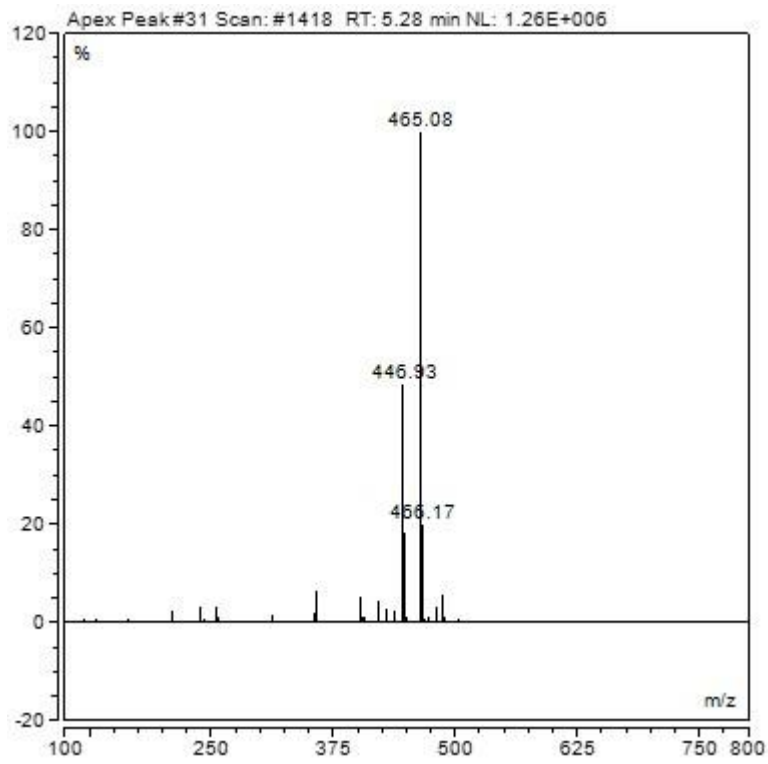

10: exact mass = 504.19

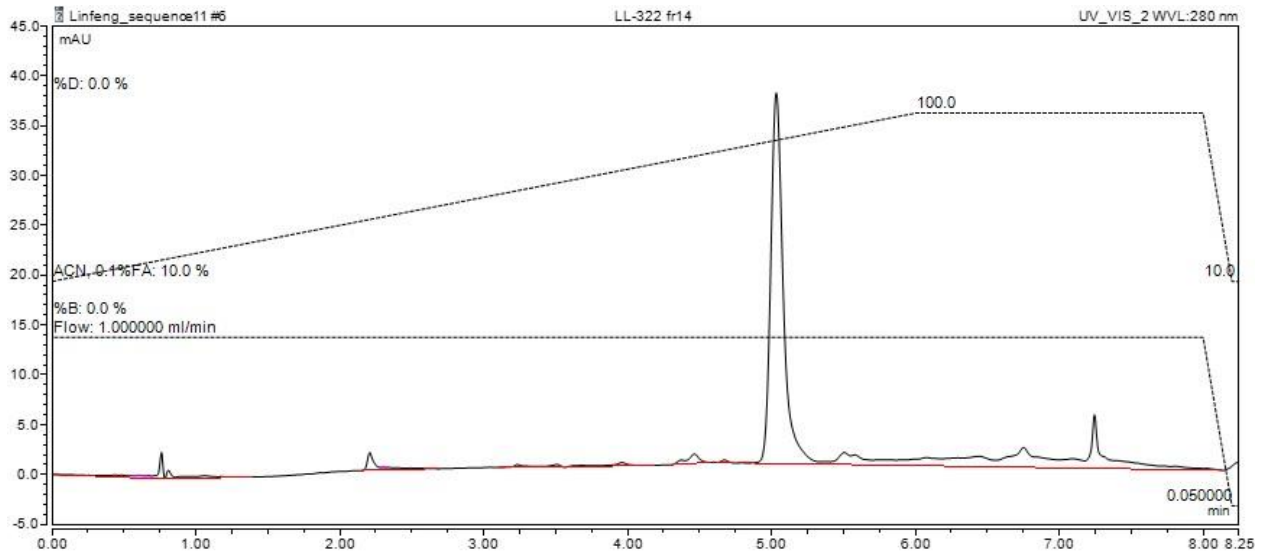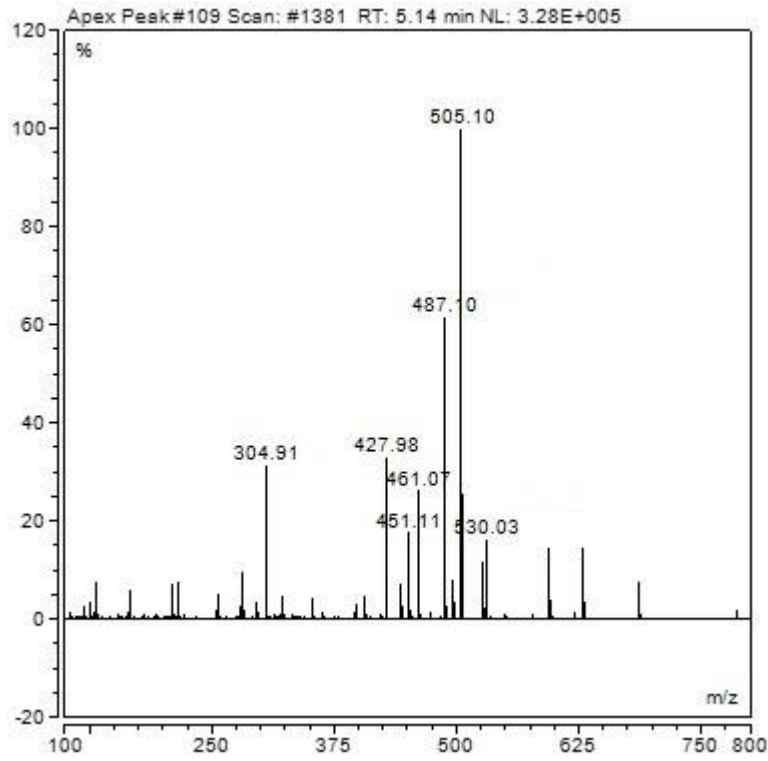

11: exact mass = 436.25

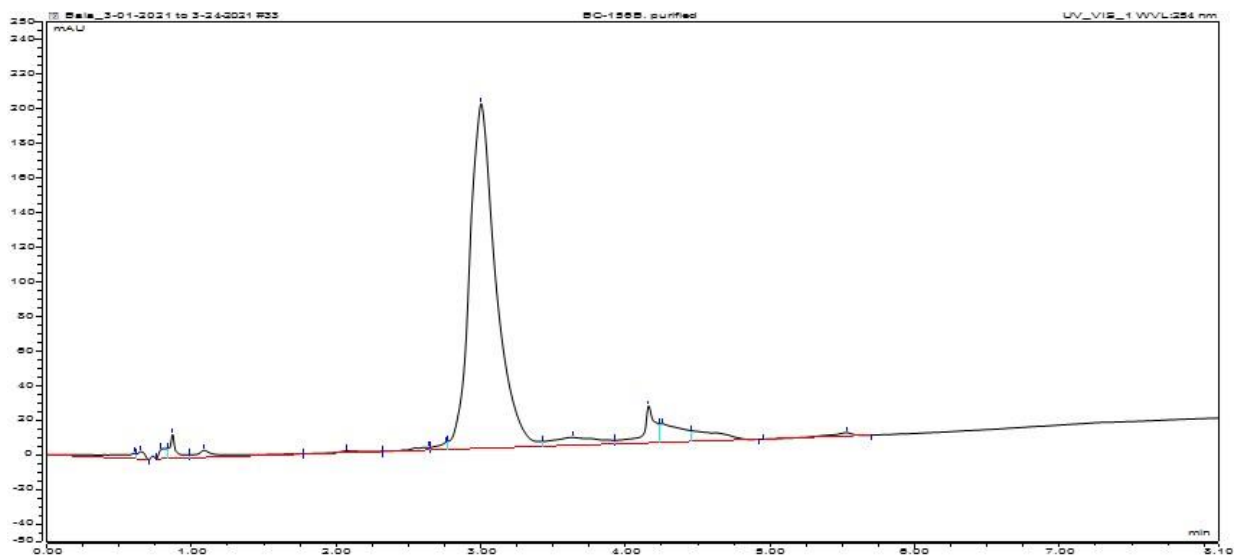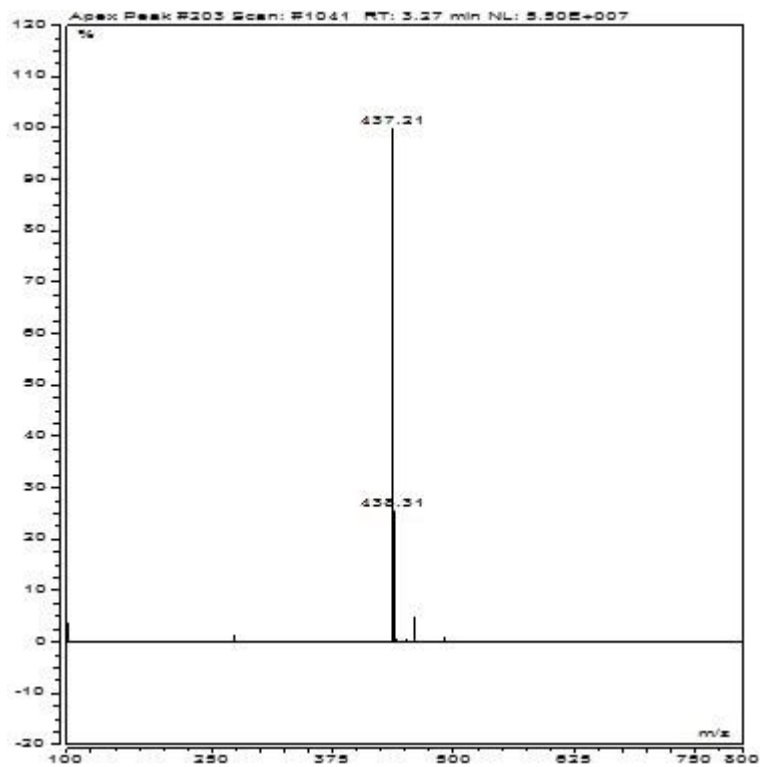

12: exact mass = 438.23

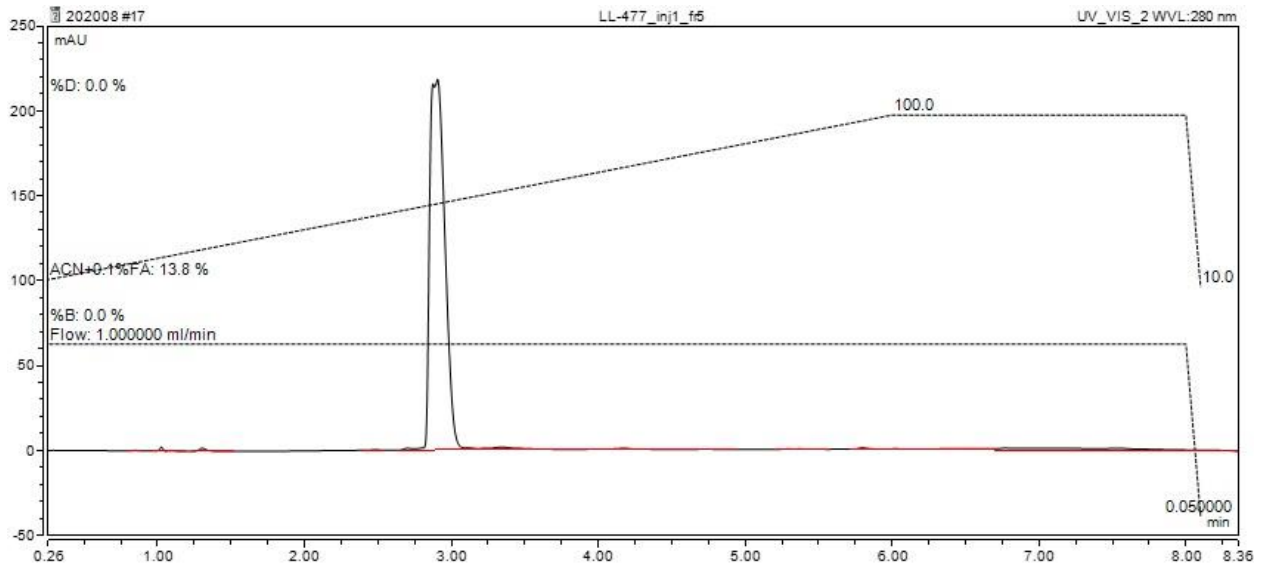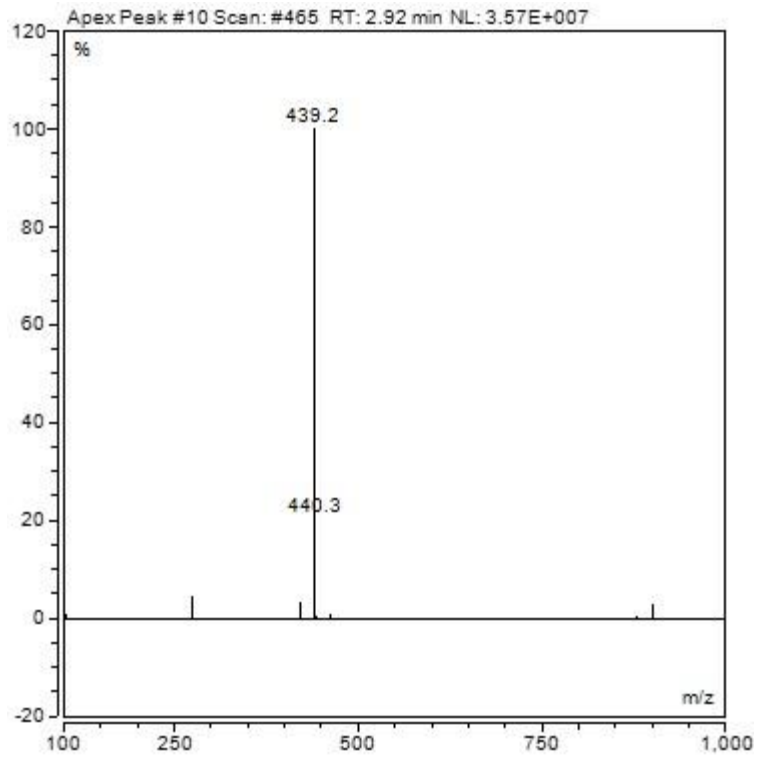

13: exact mass = 480.24

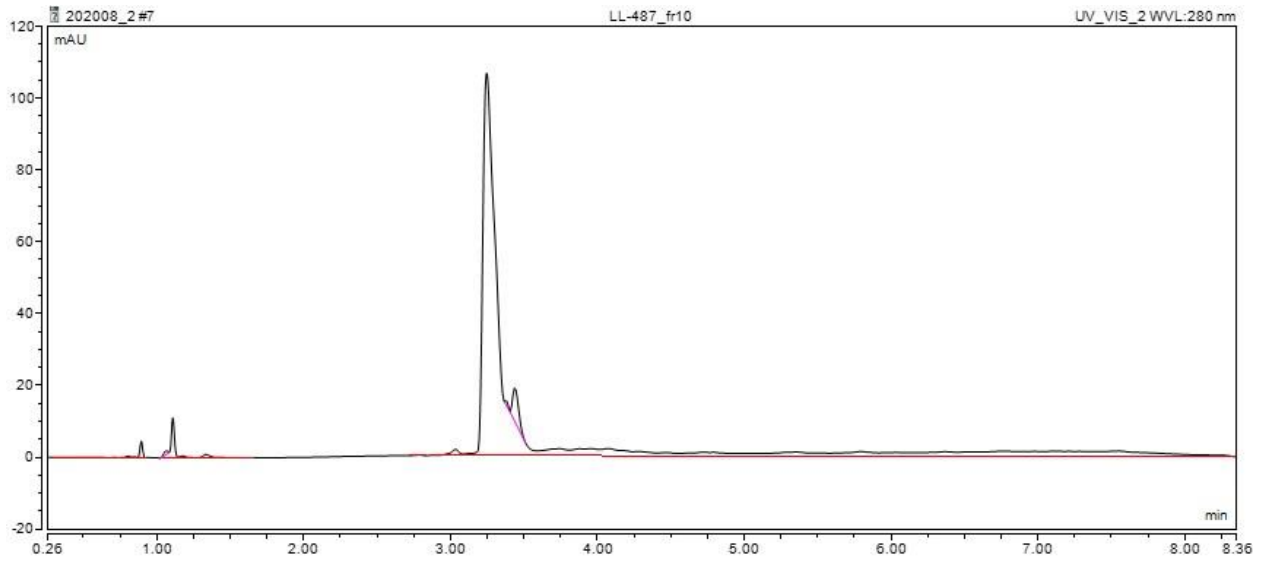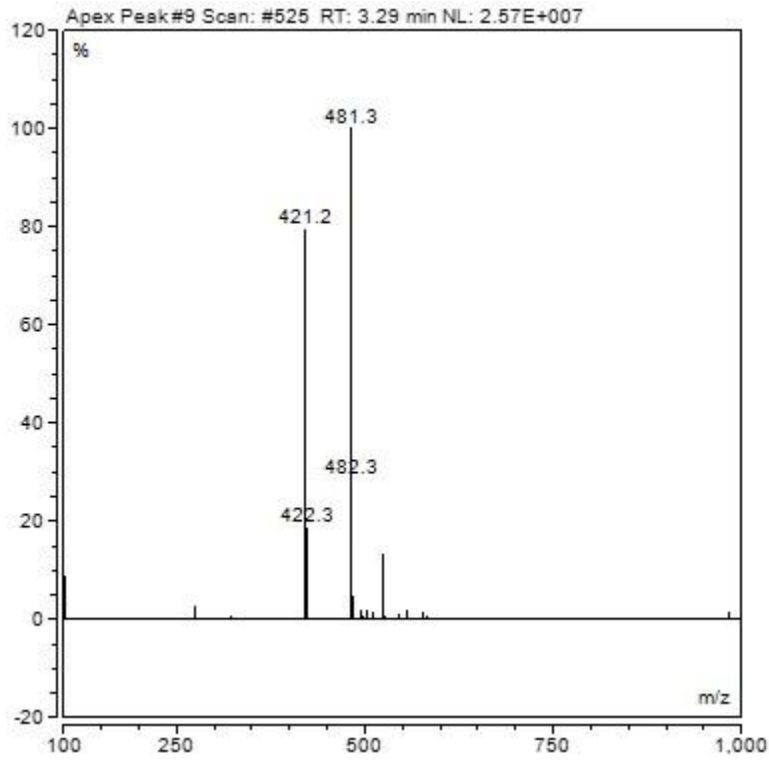

14: exact mass = 494.25

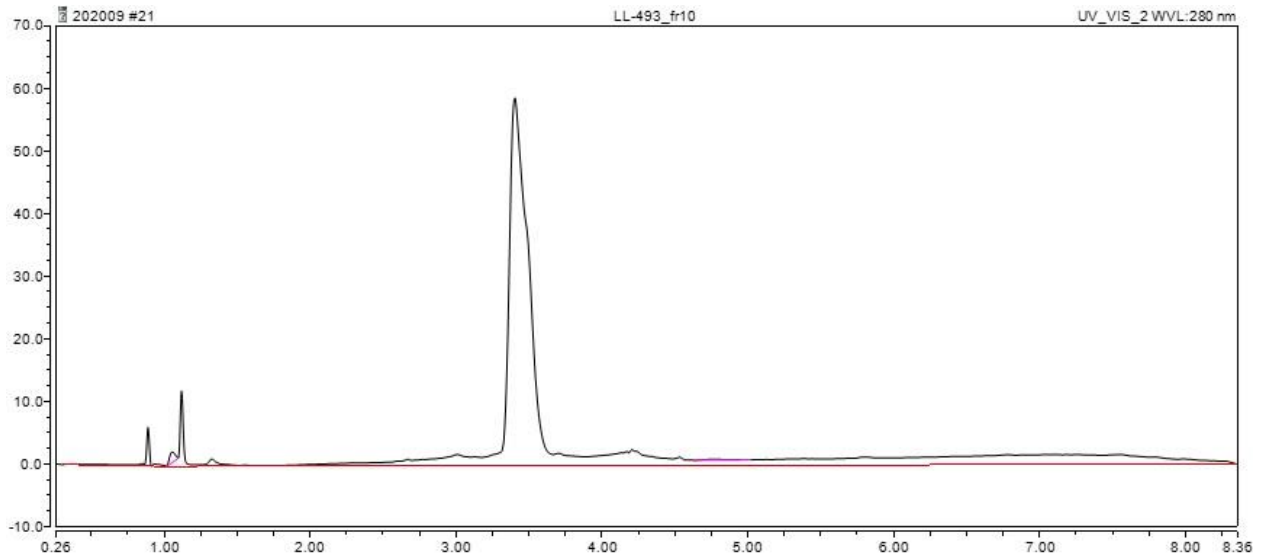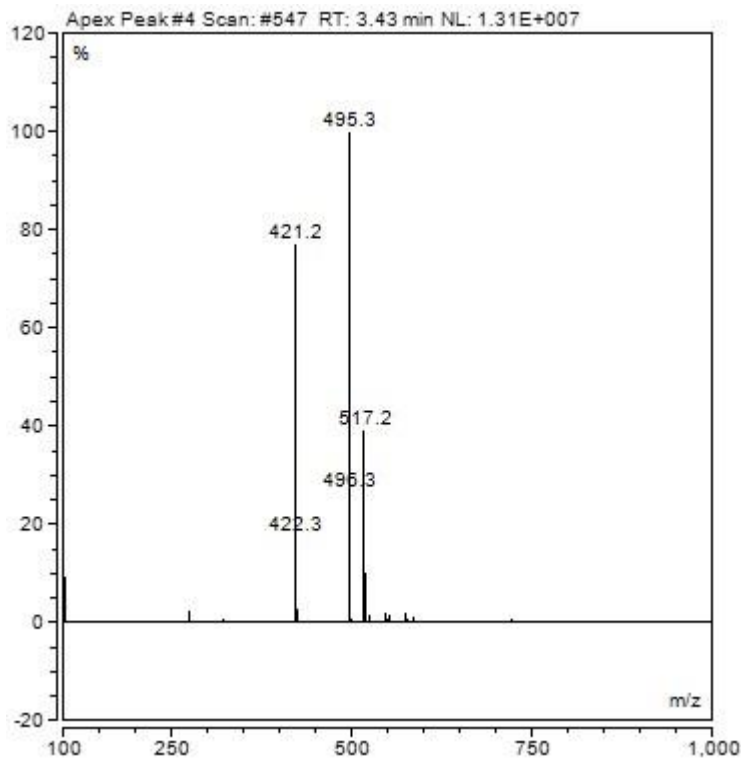



15: exact mass = 508.27

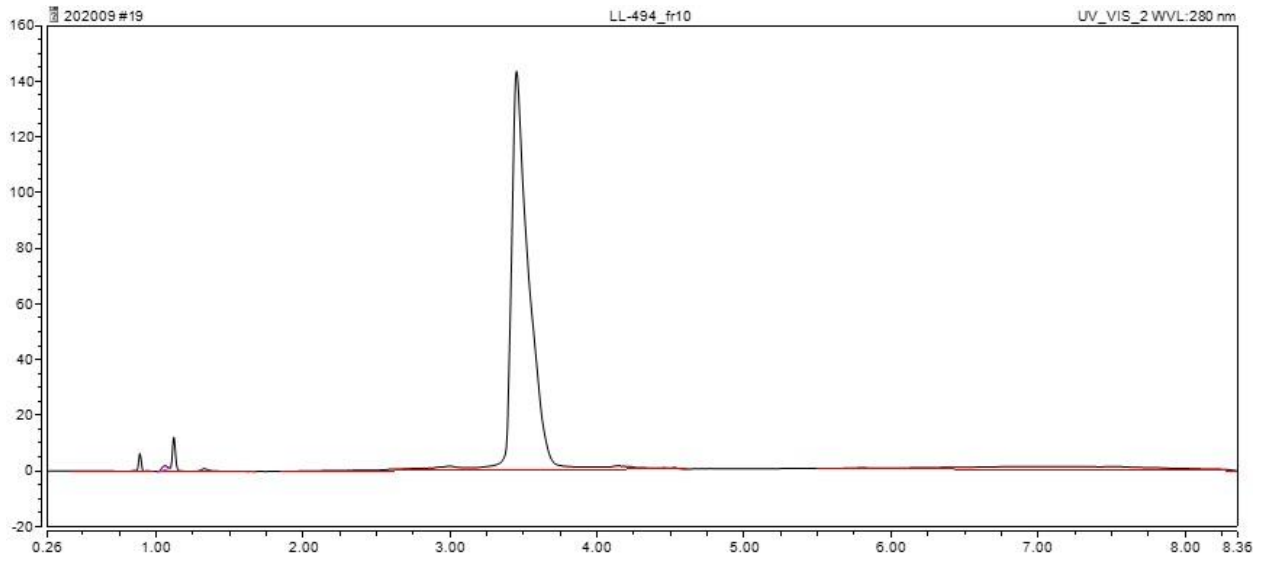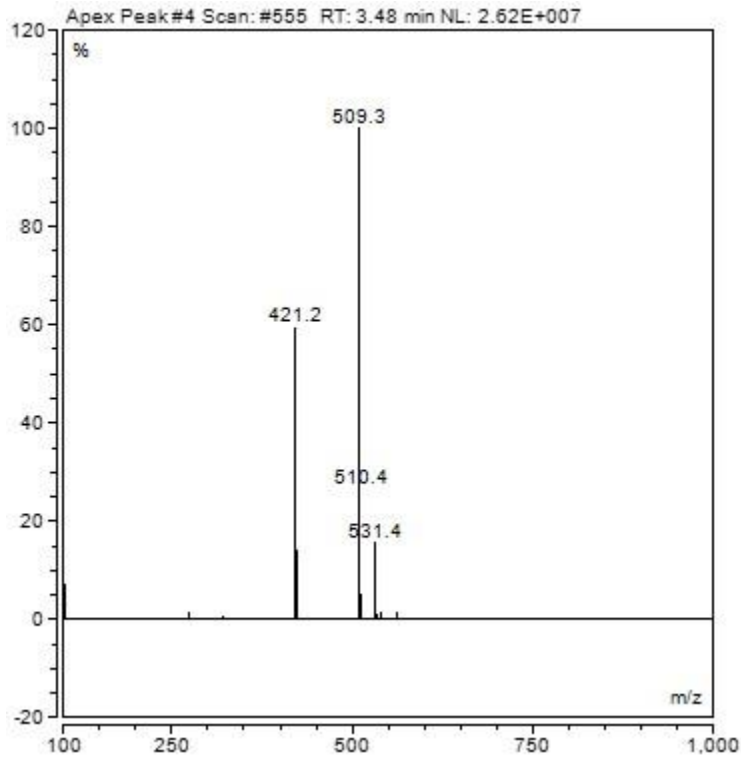

16: exact mass = 466.26

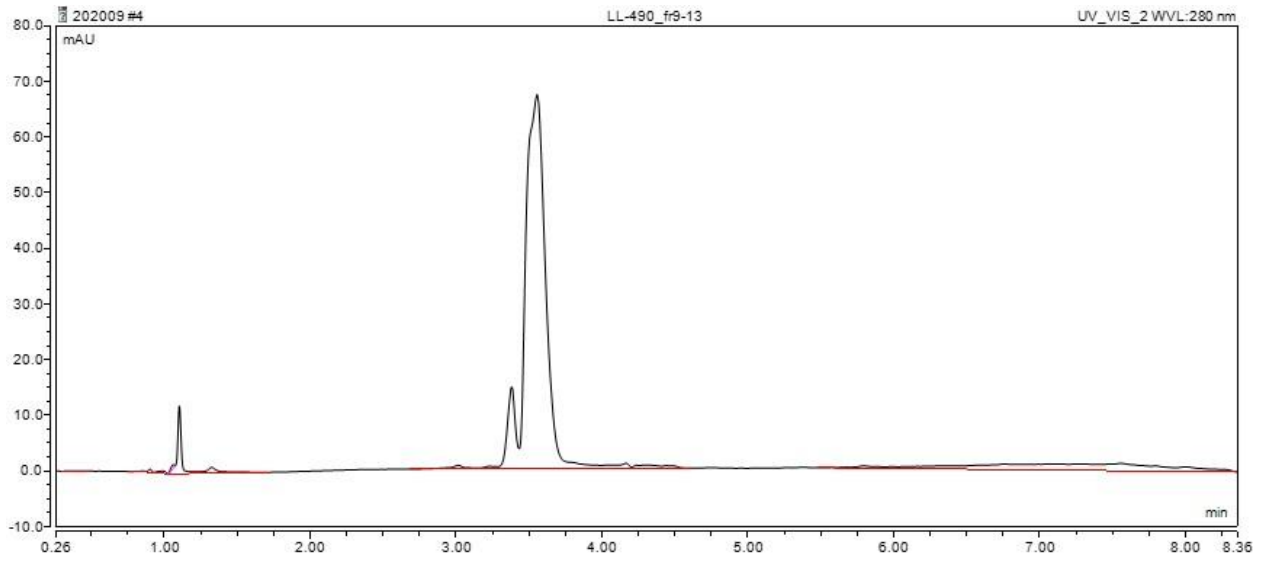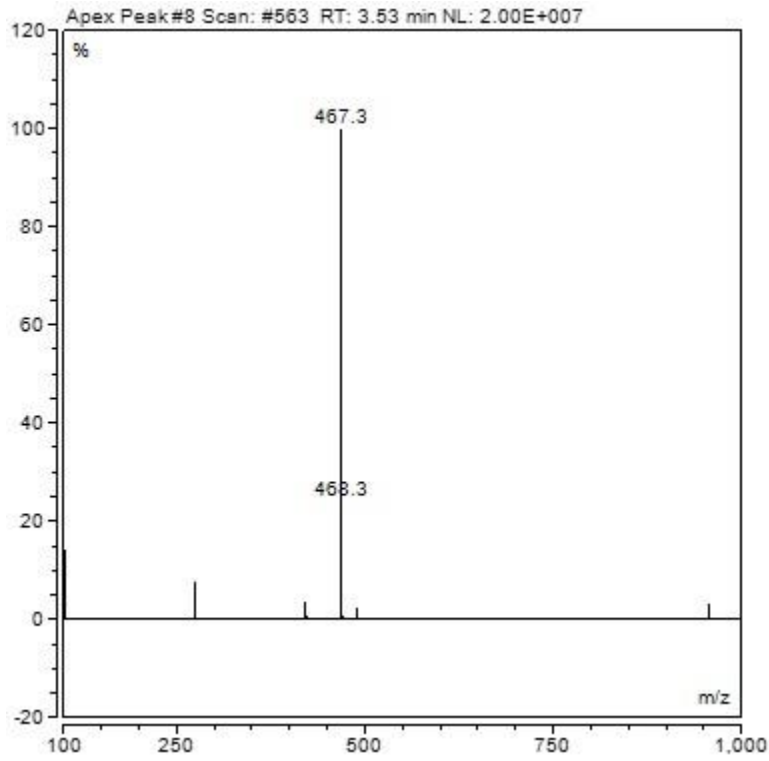

17: exact mass = 480.27

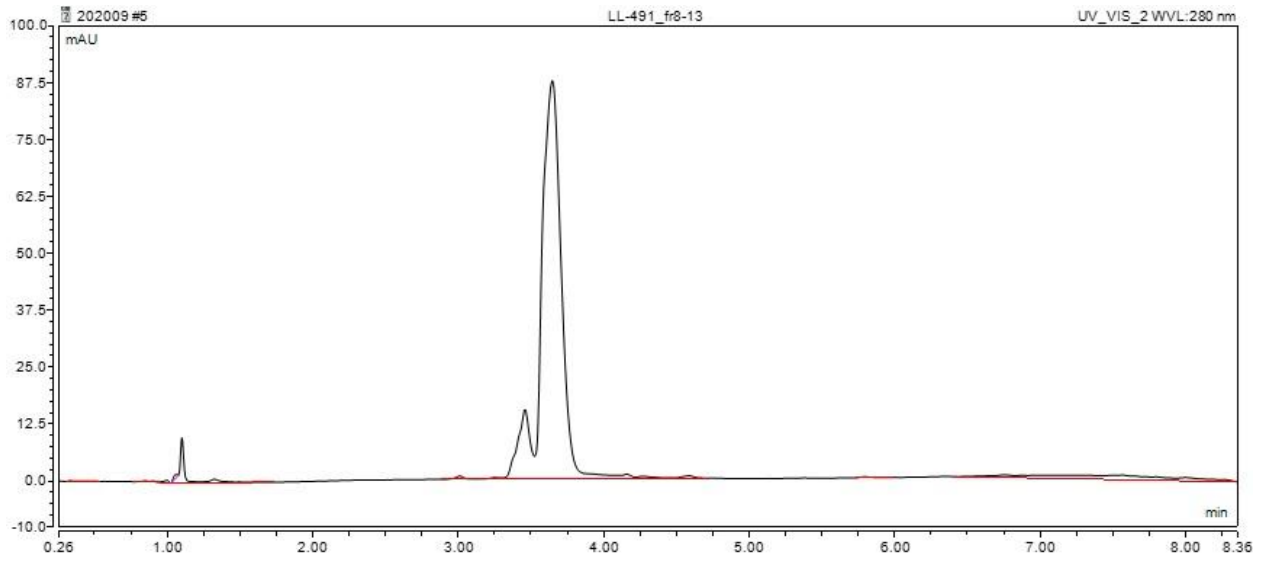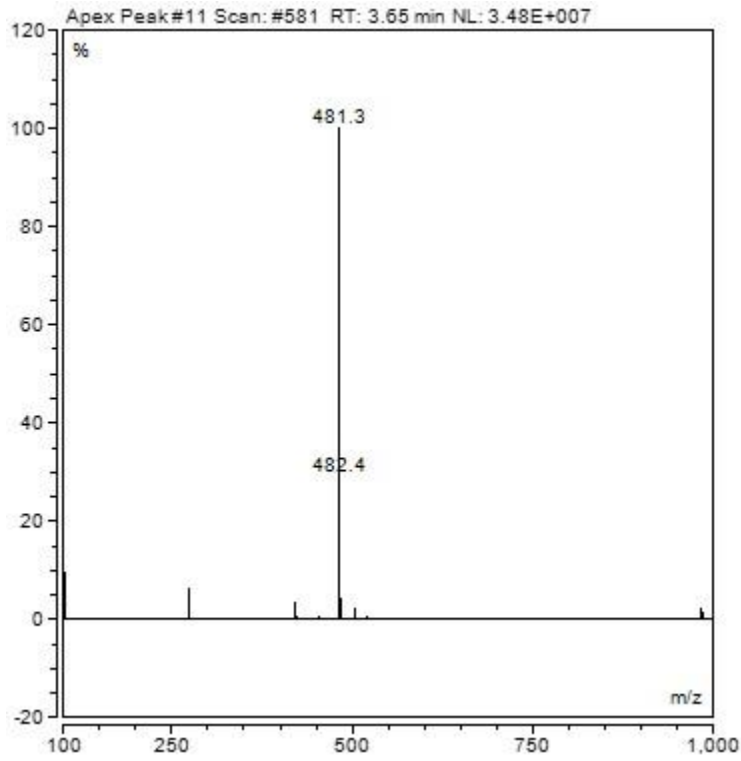

18: exact mass = 552.29

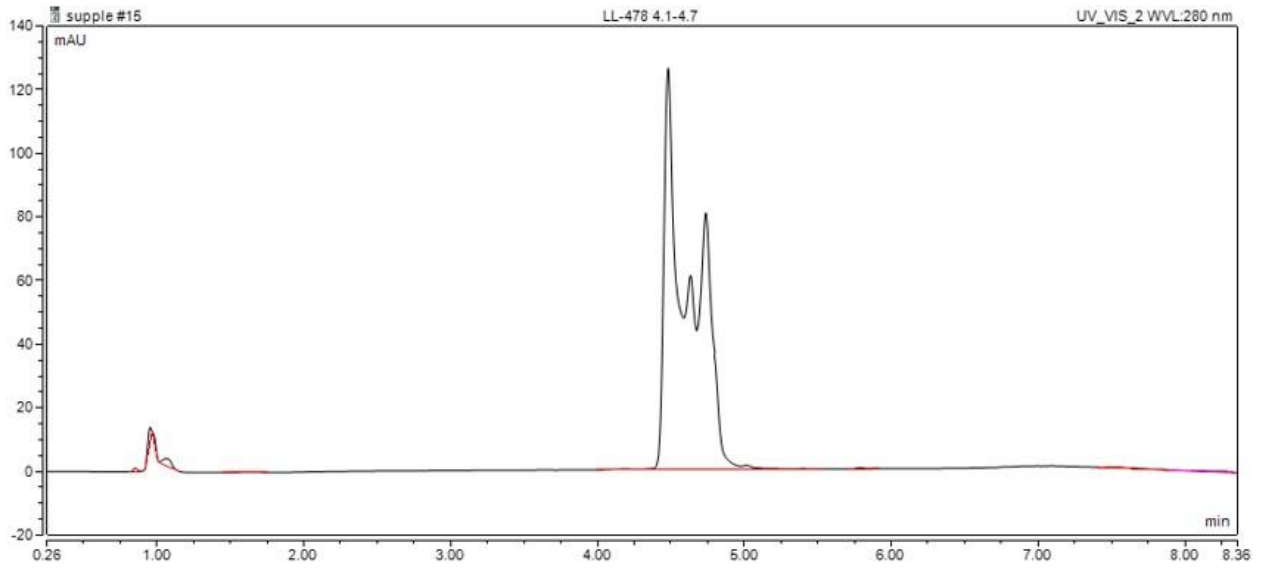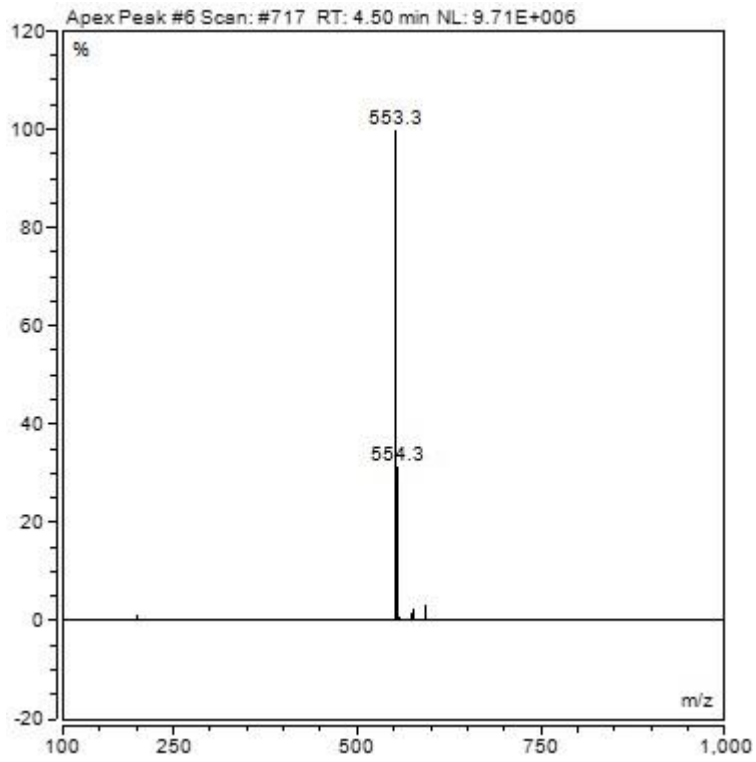

Supplement: NIHMS1914999-supplement-supplementary_information.pdf [file NIHMS1914999-supplement-supplementary_information.pdf]
